# Developmentally determined intersectional genetic strategies to dissect adult somatosensory circuit function

## Authors

Manon Bohic<sup>\*1,2,8</sup>, Aman Upadhyay<sup>\*1,2,7,8</sup>, Jessica Keating<sup>1,2</sup>, Rhiana Simon<sup>4</sup>, Brandy Briones<sup>4</sup>, Chloe Azadegan<sup>1,2</sup>, Peter Romanienko<sup>3</sup>, Garret Stuber<sup>4</sup>, Victoria Abraira<sup>1,2,9</sup>

\* These authors have contributed equally

<sup>1</sup>Cell Biology and Neuroscience Department, Rutgers University, The State University of New Jersey, New Brunswick, United States of America

<sup>2</sup>W.M. Keck Center for Collaborative Neuroscience, Rutgers University, The State University of New Jersey, New Brunswick, United States of America

<sup>3</sup>Genome Editing Shared Resource, Rutgers Cancer Institute of New Jersey, New Brunswick, United States of America

<sup>4</sup>Department of Anesthesiology and Pain Medicine, Center for Neurobiology of Addiction, Pain, and Emotion, Washington University

<sup>5</sup>School of Medicine, Oregon Health & Science University, Portland, Oregon, United States of America

<sup>6</sup>M.D./PhD program in Neuroscience, School of Medicine, Oregon Health & Science University, Portland, Oregon, United States of America

<sup>7</sup>Neuroscience PhD program at Rutgers Robert Wood Johnson Medical School, Piscataway, New Jersey, United States of America

<sup>8</sup>Co-first author

<sup>9</sup>Corresponding author

## Correspondence

victoria.abraira@rutgers.edu (V.E.A)

## In brief

We describe the generation of a *Hoxb8<sup>FlpO</sup>* mouse line that targets Flp-recombinase expression to the spinal cord, dorsal root ganglia, and caudal viscera. This line can be used in intersectional Cre/Flp strategies to restrict manipulations to the caudal nervous system. Additionally, we describe an intersectional genetics+viral strategy to convert developmental GFP expression into Cre expression, allowing for modular incorporation of viral tools into intersectional genetics. This approach allows for manipulation of a developmentally determined lineage in the adult. This strategy is also more accessible than traditional intersectional genetics, and can adapt to the constantly evolving available viral repertoire.

## Highlights

- A new *Hoxb8<sup>FlpO</sup>* mouse line allows Flp-dependent recombination in the spinal cord, DRG, and caudal viscera
- We observed no ectopic brain expression across mouse genetic backgrounds with the *Hoxb8<sup>FlpO</sup>* mouse line
- Combining this new mouse line for intersectional genetics and a viral approach, we provide a novel pipeline to target and manipulate developmentally defined adult spinal circuits.

## SUMMARY (250 words)

Improvements in the speed and cost of expression profiling of neuronal tissues offer an unprecedented opportunity to define ever finer subgroups of neurons for functional studies. In the spinal cord, single cell RNA sequencing studies<sup>1,2</sup> support decades of work on spinal cord lineage studies<sup>3–5</sup> offering a unique opportunity to probe adult function based on developmental lineage. While Cre/Flp recombinase intersectional strategies remain a powerful tool to manipulate spinal cord neurons<sup>6–8</sup>, the field lacks genetic tools and strategies to restrict manipulations to the adult mouse spinal cord at the speed at which new tools develop. This study establishes a new workflow for intersectional mouse-viral strategies to dissect adult spinal cord circuit function based on developmental genetic lineage. To restrict manipulations to the spinal cord, we generate a brain-sparing *Hoxb8<sup>FlpO</sup>* mouse line restricting Flp-recombinase expression to caudal tissue. Recapitulating endogenous *Hoxb8* gene expression<sup>9</sup>, Flp-dependent reporter expression is present in the caudal embryo starting day 10.5. This expression restricts FlpO activity in the adult to the caudal brainstem and below. *Hoxb8<sup>FlpO</sup>* heterozygous and homozygous mice do not develop any of the sensory or locomotor phenotypes evident in *Hoxb8* heterozygous or mutant animals<sup>10,11</sup>, suggesting normal developmental function of the *Hoxb8* gene and protein in *Hoxb8<sup>FlpO</sup>* mice. Comparing the variability of brain recombination to available caudal Cre and Flp lines<sup>12,13</sup> we show that *Hoxb8<sup>FlpO</sup>* activity is not present in the brain above the caudal brainstem, independent of mouse genetic background. Lastly, we combine the *Hoxb8<sup>FlpO</sup>* mouse line with a dorsal horn developmental lineage Cre mouse line to express GFP in developmentally determined dorsal horn populations. Using GFP dependent Cre recombinase viruses<sup>14</sup>, we target this lineage in the adult to show how this strategy can incorporate viral tools in a modular fashion. In summary, this new mouse line and viral approach provides a blueprint to dissect adult somatosensory circuit function using Cre/Flp genetic tools to target spinal cord interneurons based on genetic lineage.

## INTRODUCTION (600 words)

Lineage-tracing studies have revealed distinct molecularly-defined clusters of neural progenitor cells that assemble into circuits responsible for various functions. In the spinal cord, this methodology has led to the identification and genetic targeting of key neural lineages that develop into populations responsible for somatosensory and locomotor behaviors<sup>4,5,15,16</sup>. Combining these lineage-defined Cre-mouse lines with fluorophores and actuators has allowed key insights into our understanding of the relationship between cell identity and function. One of the prominent uses of this approach is dissecting somatosensory function, specifically nociception, where manipulations of different molecularly-defined neuronal populations have various effects on pain processing<sup>17,18</sup>. However, the anatomical substrates of nociception span across the dorsal root ganglia and spinal cord to the brain<sup>19–22</sup>, suggesting a need for spatial resolution to compare spinal and supraspinal pathways. To address this, the field has utilized intersectional Cre/Flp approaches to selectively target spinal neurons and elucidate their contributions to nociception<sup>18,23,24</sup>. A key part of these approaches relies on efficient intersectional targeting, often utilizing molecularly-targeting Cre lines with anatomically-restricted developmental Flp lines<sup>6,25,26</sup>. Therefore, one limitation of intersectional approaches is the availability and specificity of mouse lines targeting an anatomical region of interest. For research looking at spinal contributions to somatosensation and locomotion, mouse lines targeting the spinal cord and DRG are invaluable tools. Fortunately, there are available Flp-recombinase lines that target the caudal neuroectoderm (*Cdx2<sup>NSE-FlpO</sup>*, *Cdx2<sup>FlpO</sup>*)<sup>12,27</sup> or the spinal dorsal horn + dorsal hindbrain (*Lbx1<sup>FlpO</sup>*)<sup>28</sup> which can be used to target the caudal nervous system. However, expression of these genes can exceed past the spinal cord into the hindbrain and brain<sup>29,30</sup>, which should be considered for studies conducting brain-sparing manipulations. Therefore, the availability of a brain-sparing mouse line that better restricts expression to the caudal nervous system would greatly benefit researchers looking to elucidate spinal versus supraspinal contribution to somatosensory and motor function.

The ability to target finer subsets of neuronal populations using intersectional Cre/Flp recombinase systems has allowed for greater insights into cellular function based on molecular and anatomical identity<sup>27,31,32</sup>. These

intersectional approaches utilize a genetic toolbox of Cre- and Flp-dependent mice that allow for targeted ablation<sup>18</sup>, chemogenetic manipulation<sup>33,34</sup>, or optogenetic access<sup>35,36</sup>. Although invaluable, one caveat of intersectional approaches is the complex genetic strategies needed to attain intersection-specific expression. For a single intersection, there are often many associated reporters and actuators<sup>37</sup>, requiring extensive time and breeding costs to obtain triple or quadruple transgenic animals. Furthermore, intersectional approaches are limited to the availability of dual-recombinase mouse lines, which may not be readily developed for specific usages. Therefore, intersectional strategies are not easily accessible, and can come with a high cost and time barrier. Fortunately, there are a vast number of viral tools available for Cre- and/or Flp-dependent delivery of a multitude of reporters and actuators<sup>38,39</sup>. Taking advantage of the popularity of GFP mouse lines, one group developed a virus which expresses Cre-recombinase in the presence of GFP (Cre-DOG)<sup>14</sup>. This virus transforms GFP from a reporter into a genetic access point, allowing for the usage of various Cre-dependent viruses. This is particularly useful in developmental populations, where gene expression is transient during development and fades in the adult. One such dynamic environment is the spinal cord, where transient genes are important for the emergence of neuronal populations that transmit somatosensory information<sup>40–42</sup>. Therefore, the ability to target molecularly-defined populations during development allows for the ability to manipulate the same lineage in the adult, where the gene may no longer be expressed. Furthermore, this strategy can leverage GFP expression in a lineage to allow for viral access, which may not have been previously possible with transient markers.

In order to build on the repertoire of available tools for efficient targeting of adult spinal circuits, we first developed a mouse line to restrict recombinase expression to the spinal cord and caudal tissue. We chose to utilize the Flp-FRT recombinase system<sup>7</sup> which is compatible and can be used alongside intersectional Cre-loxP approaches. To achieve spinal targeting, we expressed Flp recombinase under transcriptional control of mouse homeobox gene *Hoxb8*, which is expressed from development onwards and displays a sharp spatial expression boundary at cervical spinal segment C1/2<sup>9</sup>. Additionally, *Hoxb8*<sup>FlpO</sup> mice are viable and fertile, with no obvious sensory or motor deficits. Therefore, this novel *Hoxb8*<sup>FlpO</sup> mouse line has the advantages of restricted expression to caudal tissue as well as compatibility with existing Cre approaches. To provide an alternative to the costs of intersectional genetics, we developed a combinatorial genetic-viral strategy that is compatible with constantly updating tools in the field and can be used to target developmental populations in the adult. We utilized a Cre/Flp approach to express GFP in a developmental subset of spinal dorsal horn neurons under the transcriptional control of *Lbx1*<sup>30,43</sup> and *Hoxb8*. We next injected a GFP-dependent Cre-DOG virus<sup>14</sup> in order to express Cre recombinase in the GFP+ adult neuronal population. With this approach, we enabled expression of Cre recombinase and a Cre-dependent reporter in developmentally determined adult neurons, which can then be probed with different fluorescent reporters or actuators. Therefore, this strategy enables modular manipulation of adult neurons defined by developmental markers, which will allow for greater insight into the relationship between development and function in sensorimotor processing.

## RESULTS

### Generation of *Hoxb8*<sup>FlpO</sup> mice

We generated a novel mouse line for flippase-dependent recombination of caudal tissue by targeting the codon-optimized Flp recombinase to the 3'UTR of the mouse homeobox gene *Hoxb8* via CRISPR/Cas9<sup>44</sup>. The *Hoxb8* gene was targeted due to its early expression pattern in caudal viscera as well as in spinal and dorsal root ganglia neuron development, and shows a sharp expression boundary in the neuraxis below spinal segment C2<sup>9,45</sup>, making it a strong candidate for targeting spinal circuits. To ensure high levels of Flp recombinase expression and not disrupt endogenous *Hoxb8* gene function, our strategy utilizes a T2A-FlpO gene cassette<sup>46</sup> to replace the *Hoxb8* stop codon before the 3'UTR (Fig 1A). We evaluated FlpO activity by inserting the T2A-FlpO construct into a high-copy pBluescript plasmid and co-transfected it into NEB 10-beta competent E.coli cells along with a Flp-dependent GFP reporter pCMV<sup>Dsred-FRT-GFP-FRT</sup>. Cells cotransfected with

the *Hoxb8<sup>FlpO</sup>* plasmid expressed Flp-mediated GFP recombination, while cells lacking the *Hoxb8<sup>FlpO</sup>* plasmid did not express GFP (Fig 1B). The donor plasmid contained a 1987bp 5' homology arm sequence, a 1077bp 3' homology sequence and a T2A sequence in frame with FlpO. Eleven founders were found to have both arms correctly targeted, and one founder was chosen to establish the *Hoxb8<sup>FlpO</sup>* colony. We bred this founder to C57BL/6J females and used PCR genotyping to identify *Hoxb8<sup>FlpO/+</sup>* F1 progeny (Fig 1C). Progenies of this male will be available at JAX.

### ***Hoxb8<sup>FlpO</sup>* mediated transgene expression is restricted to caudal structures starting embryonic day**

**10.5.** To characterize the developmental pattern of Flp expression, *Hoxb8<sup>FlpO</sup>* mice were crossed to Rosa26-Frt-STOP-Frt-TdTomato (FSF-TdTomato) reporter mice derived from the Ai65 mouse line (JAX#021875) (Fig 2A). We examined E10.5 and E11.5 *Hoxb8<sup>FlpO</sup>*;FSF-TdTomato embryos for expected patterns of *Hoxb8* expression. E10.5 *Hoxb8<sup>FlpO/+</sup>*;FSF-TdTomato+ embryos exhibited tdTomato fluorescence that was strongly restricted to the caudal neuraxis, gradually fading near somite 10 and up (Fig 2B). By E11.5 we see TdTomato fluorescence higher up in the neuraxis, fading near somite 1 (Fig 2C). TdTomato fluorescence was not observed in *FlpO<sup>-/-</sup>*;FSF-TdTomato+ littermates. To further assess expression patterns of *Hoxb8<sup>FlpO</sup>* during development, cryostat sections were taken from E11.5 *Hoxb8<sup>FlpO/+</sup>*;FSF-TdTomato mouse embryos. Transverse sections from whole embryos (Fig 2D) reveal strong tdTomato fluorescence in the neural tube and dorsal root ganglia as well as caudal viscera and skin, recapitulating the timeline and location of expected *Hoxb8* gene expression<sup>9</sup>. These expression patterns are also consistent with those reported for other mouse lines targeting the *Hoxb8* locus<sup>10,11,45</sup>.

### ***Hoxb8<sup>FlpO</sup>* mediated transgene expression in the adult CNS is restricted to the spinal cord and DRG**

To analyze CNS recombination in adult animals we sectioned tissue from adult P30-37 *Hoxb8<sup>FlpO</sup>*;FSF-TdTomato mice. In coronal sections of the upper cervical spinal cord, Flp-mediated TdTomato fluorescence was observed with a rostral expression boundary at cervical segment C2 (Fig 3A). In addition, TdTomato fluorescence was observed in few neurons in the beginning of the caudal brainstem (Fig 3B) and only in neuronal tracts in the rostral brainstem (Fig 3C). In transverse spinal sections, TdTomato fluorescence was seen throughout the spinal gray matter, present in NeuN+ cells (Fig 3D). Spinal Iba1+ microglia did not exhibit TdTomato fluorescence (Fig S1A), suggesting FlpO expression is restricted to neurons and blood vessels in the spinal cord. To assess *Hoxb8<sup>FlpO</sup>* recombination in the dorsal root ganglia (DRG), we cryosectioned adult DRGs from *Hoxb8<sup>FlpO</sup>*;FSF-TdTomato mice. TdTomato fluorescence in the lumbar DRG was observed in all DRG neurons, including CGRP+ and IB4+ neurons (Fig 3E). Similar patterns of expression were seen in cervical (Fig S1B) and thoracic DRG (Fig S1C). Next, we assessed *Hoxb8<sup>FlpO</sup>* expression in caudal viscera by taking cryosections of peripheral tissue and organs from adult *Hoxb8<sup>FlpO</sup>*;FSF-TdTomato mice. Cryosections of the metatarsal hindlimb glabrous skin (Fig S1D) showed Tomato fluorescence primarily in the subcutis, with very sparse labeling in the reticular dermis. Within the kidney (Fig S1E), TdTomato fluorescence was present in endothelial cells. No TdTomato fluorescence was observed in the liver (Fig S1F) or heart (Fig S1G). This expression pattern recapitulates both *in situ* hybridization results against *Hoxb8*<sup>47</sup> as well as mouse lines targeting the *Hoxb8* locus<sup>10,45</sup>.

To assess *Hoxb8<sup>FlpO</sup>* recombination in supraspinal structures, we took coronal sections of brain tissue from adult *Hoxb8<sup>FlpO</sup>*;FSF-TdTomato mice. Flp-mediated TdTomato fluorescence was restricted to the brainstem and did not extend past the rostral brainstem (Fig 3F). To compare this expression pattern to existing caudal-targeting recombinase mouse lines, we took coronal brain sections from *Cdx2<sup>NSE-FlpO</sup>*;FSF-TdTomato (Fig 3G) and *Cdx2<sup>Cre</sup>*;R26-LSL-TdTomato (Ai14, JAX#007914) (Fig 3G) mice<sup>12,13</sup>. The *Cdx2<sup>Cre</sup>* mouse line was generated by using a human caudal type homeobox 2 promoter/enhancer sequence driving expression of a nuclear-localized Cre recombinase<sup>29</sup>. The *Cdx2<sup>NSE-FlpO</sup>* mouse line was generated by using a fragment of intron 1 of the mouse *Cdx2* gene along with a neural specific enhancer sequence driving Flp recombinase



expression<sup>12</sup>. The *Cdx2*<sup>NSE-FlpO</sup> line is recommended to be maintained on a 50% FVB background for proper expression, reflecting the fact that the regulatory elements used to generate this line were cloned from FVB genomic DNA<sup>29</sup>. However, it can be difficult to maintain complex double or triple transgenic intersections on a specific background. Therefore, to see how well the *Cdx2*<sup>NSE-FlpO</sup> line functioned on a lesser FVB background, we assessed the efficiency of *Cdx2*<sup>NSE-FlpO</sup> on either a 25% or 12.5% FVB background. We took coronal brain sections from *Hoxb8*<sup>FlpO</sup>;FSF-TdTomato, *Cdx2*<sup>NSE-FlpO</sup>;FSF-TdTomato and *Cdx2*<sup>Cre</sup>;Ai14 (Fig 3I) mice to compare TdTomato fluorescence in the brain. Here, neuronal TdTomato fluorescence was observed in 0/10 *Hoxb8*<sup>FlpO</sup>;FSF-TdTomato brains, with sparse labeling observed within glial cells primarily in the cortex (Fig S1H), consistent with established *Hoxb8* expression patterns<sup>48</sup>. Comparatively, 7/7 *Cdx2*<sup>NSE-FlpO</sup>;FSF-TdTomato brains exhibited broad and non-specific neuronal TdTomato fluorescence when mice were bred on a 25% FVB background. Additionally, 8/8 brains showed TdTomato fluorescence when bred on a 12.5% FVB background. Furthermore, 5/5 *Cdx2*<sup>Cre</sup>;Ai14 brains exhibited neuronal TdTomato fluorescence in the brain, largely in the cortex (Fig S1I) and sparsely in the parabrachial nucleus (PBN) (Fig S1J). One main facet of studying pain and itch is the ability to target projection neurons, so we assessed if the *Hoxb8*<sup>FlpO</sup> line can be used to study spinal projections to the brain. We utilized *Hoxb8*<sup>FlpO</sup>;FSF-Synaptophysin-GFP (derived from RC::FPSit mice, JAX# 030206) to label synaptic projections from *Hoxb8* tissue (Fig 3J). We observed synaptic inputs throughout the brainstem, hindbrain, and cerebellum, amongst other places. Notably, we observed GFP+ puncta in the thalamus (Fig 3J) and PBN (Fig 3K), representing spinothalamic and spinoparabrachial projections, respectively. Collectively, this suggests that *Hoxb8*<sup>FlpO</sup> can be utilized to efficiently target the caudal nervous system without having obvious strong background effects.

### Normal spinal cord development and somatosensory function in *HoxB8*<sup>FlpO</sup> heterozygous and homozygous animals.

Deletion of the *Hoxb8* allele during development results in abnormal dorsal horn laminae formation and sensory defects<sup>49</sup>, abnormal limb movements<sup>10</sup>, and excessive grooming behavior<sup>11,50</sup>. To ensure that insertion of the T2A-FlpO sequence into the 3'UTR of the *Hoxb8* gene did not affect endogenous *Hoxb8* activity, and by association normal spinal cord development and function, we first assessed dorsal horn lamination in heterozygous and homozygous *Hoxb8*<sup>FlpO</sup> mice compared to wild type littermates. We took transverse sections from lumbar spinal cords of wild type (Fig 4A), *Hoxb8*<sup>FlpO/+</sup> (Fig 4B) and *Hoxb8*<sup>FlpO/FlpO</sup> (Fig 4C) male and female mice and used immunohistochemistry to stain for markers defining lamina I (CGRP), lamina II (IB4), and lamina III (vGlut3). No observable difference was seen in dorsal horn lamination between *Hoxb8*<sup>FlpO/+</sup> and *Hoxb8*<sup>FlpO/FlpO</sup> lumbar sections compared to the wild-type sections. Next, given the ubiquitous expression pattern of *Hoxb8* in the spinal cord and dorsal root ganglia, we assessed if the T2A-FlpO insertion had any effect on sensory or motor function in *Hoxb8*<sup>FlpO/+</sup> and *Hoxb8*<sup>FlpO/FlpO</sup> male and female mice. Both heterozygous and homozygous mice had no difference in sensitivity to dynamic brush (Fig 4D), von Frey (Fig 4E), pinprick (Fig 4F), or Hargreaves (Fig 4G) stimulation of the plantar hindlimb compared to wild type littermates, suggesting normal tactile and thermal sensitivity. Given that *Hoxb8* manipulation disrupts proper grooming<sup>11</sup>, we next isolated and recorded individual mice to determine if T2A-FlpO insertion affected self-grooming behavior. *Hoxb8*<sup>FlpO/+</sup> and *Hoxb8*<sup>FlpO/FlpO</sup> mice spent a comparable amount of time grooming themselves compared to wild type littermates (Fig 4H). Next, due to evidence that *Hoxb8* mutations can result in aberrant limb reflexes<sup>10</sup>, we tested limb reflexes and found no evidence of hindlimb claspings or other aberrant reflexes in *Hoxb8*<sup>FlpO/+</sup> or *Hoxb8*<sup>FlpO/FlpO</sup> mice. Lastly, *Hox* genes have been implicated in proper motor neuron development and locomotor function<sup>51</sup>. To assess motor function, we used the Digigait automated treadmill<sup>52</sup> to analyze locomotor gait parameters in *Hoxb8*<sup>FlpO/+</sup> and *Hoxb8*<sup>FlpO/FlpO</sup> mice. We found no significant difference across groups in stride frequency (Fig 4I), stride length (Fig S2A), or stride duration (Fig S2B), suggesting that T2A-FlpO insertion into the *Hoxb8* locus does not affect *Hoxb8* gene function in the development of normal spinal cord-mediated locomotion.

## Cre-DOG virus to manipulate spinal cord lineages defined by *Hoxb8* and *Lbx1*.

Current intersectional genetic approaches utilize a breeding strategy involving genetic intersections crossed to a multitude of dual recombinase-dependent reporters and effectors. This paradigm can lead to high maintenance and breeding costs, often requiring the long-term maintenance of breeders for multiple intersections and dual-recombinase mice. For a given intersection, one needs access to Cre-dependent reporters<sup>53</sup>, Flp-dependent reporters<sup>54</sup>, dual Cre/Flp-dependent reporters<sup>37,55,56</sup>, and a host of different effector mouse lines for ablation<sup>57</sup>, silencing<sup>58</sup>, or optogenetics<sup>59</sup>. Therefore, this strategy is only accessible to those with the ability to maintain a large animal colony for an extended period of time. The ability to visualize/manipulate molecularly-defined neurons in a modular fashion would drastically cut down on breeding costs and allow for more simple breeding strategies. This ability would be additionally useful in studying developmental populations, where gene expression can be transient. Due to this transient expression, manipulating early developmental genes to understand their functional contributions are confounded by potential developmental abnormalities or compensatory mechanisms<sup>60,61</sup>. Therefore, a strategy to manipulate molecularly determined neuronal populations in the adult would enable the comparison of developmental phenotypes to those in the mature animal.

One spinal gene important for normal somatosensory development is *Lbx1*, which is transiently expressed in the dorsal horn and is important for the neuronal differentiation of the dorsal horn and for somatosensation<sup>62,63</sup>. Studies have identified that loss of *Lbx1* leads to improper patterning of dorsal horn neurons and disrupted sensory afferent innervation<sup>62,63</sup>. Furthermore, *Lbx1* has been utilized in intersectional approaches to target neurons implicated in mechanical hypersensitivity<sup>64</sup>, pain<sup>65,66</sup> and itch<sup>28,67</sup>. To further understand *Lbx1*, we developed a method to target *Lbx1*-lineage neurons in the adult. We crossed *Lbx1*<sup>Cre</sup>;*Hoxb8*<sup>FlpO</sup> mice<sup>30</sup> to RC::FLTG mice (JAX#026932), where Flp-recombinase induces TdTomato fluorescence, and additional Cre-recombinase expression induces GFP fluorescence. In *Hoxb8*<sup>FlpO</sup>;RC::FLTG mice, Flp-mediated TdTomato fluorescence is observed in the spinal cord (Fig S3A). Within the *Lbx1*<sup>Cre</sup>;*Hoxb8*<sup>FlpO</sup>;RC::FLTG intersection, neurons that have expressed both *Hoxb8* and *Lbx1* in the spinal cord will be labeled with GFP (Fig 5A). No TdTomato fluorescence was observed in this intersection (Fig 5B). Next, we used a viral tool (AAV-Cre-DOG)<sup>14</sup> which consists of N- and C-terminal fragments of Cre-recombinase which combine and become functional solely in the presence of GFP (Fig 5C). The AAV-Cre-DOG virus was co-injected with a Cre-dependent TdTomato virus (AAV-CAG-LSL-TdTomato) into the lumbar spinal cord in order to achieve expression of TdTomato in adult *Lbx1*-lineage neurons (Fig 5D). Due to the lack of *Lbx1* expression in the adult spinal cord<sup>62</sup>, the observed TdTomato fluorescence is expected to arise from the viral Cre-DOG approach. To control for unexpected *Lbx1*<sup>Cre</sup> expression in the adult, we injected adult (P56-98) *Lbx1*<sup>Cre</sup>;*Hoxb8*<sup>FlpO</sup> mice with Cre-dependent AAV-CAG-LSL-TdTomato (Fig 5E). We observed no TdTomato fluorescence in this tissue, suggesting that TdTomato fluorescence is indeed induced by the AAV-Cre-DOG and not the *Lbx1*<sup>Cre</sup>. Additionally, we observed neuronal TdTomato fluorescence at the site of injection (Fig S3B), but not caudal to it (Fig S3C), further supporting that Cre-dependent TdTomato recombination is a result of the Cre-DOG virus itself. Using this approach, we were able to target Cre expression to adult *Lbx1*-lineage neurons in the spinal cord, which can then be further probed using Cre-dependent viral tools.

## DISCUSSION

A key advantage of mouse genetic strategies is the ability to restrict reporter or effector gene expression to a molecular defined subset of neurons. This genetic gateway can be utilized to study neurons based on their identity or geography, allowing for targeted manipulations with high specificity. For example, the study of nociception has benefitted from the ability to conduct global or conditional manipulations using the Cre/loxP system<sup>68-70</sup>. More recent studies have utilized intersectional genetic strategies, which allow for even finer manipulations of neurons of interest<sup>18,24</sup>. Although powerful, one caveat of this approach is the availability of specific mouse lines of interest, such restrictions that selectively target the DRG, spinal cord, or brain. Although

there are lines that target sensory ganglia<sup>71,72</sup> or subsets of primary afferents<sup>12,73,74</sup>, there are relatively fewer tools available to specifically target the spinal cord and DRG while sparing the brain. In order to determine spinal versus supraspinal contributions to pain, there is a constant need for the evolution of genetic tools to meet the demand of more specific manipulations. To generate a tool for better brain-sparing intersections, we developed a *Hoxb8<sup>FlpO</sup>* mouse line where *Flp* recombinase expression is largely restricted to spinal and DRG neurons, as well as caudal viscera. We show that *Hoxb8<sup>FlpO</sup>* mice exhibit Flp recombinase expression in a desired, brain-sparing pattern and are viable and fertile. Importantly, these mice can be utilized in combination with existing Cre lines for intersectional approaches to generate finer, brain-sparing intersections to study the contributions of spinal and DRG neurons to mediating nociception.

In order to develop a strategy to utilize brain-sparing recombinases in the study of pain and itch, we compared *Hoxb8<sup>FlpO</sup>* expression to other caudal-targeting mouse lines. As expected in *Hoxb8<sup>FlpO</sup>*;FSF-TdTomato tissue, we saw no neuronal TdTomato fluorescence in the brain, reflecting the endogenous expression pattern of *Hoxb8<sup>47</sup>*. However, we observed ectopic brain expression in both *Cdx2<sup>NSE-FlpO</sup>*;FSF-TdTomato and *Cdx2<sup>Cre</sup>*;Ai14 tissue, suggesting careful consideration in their usage as brain-sparing lines. The *Cdx2<sup>NSE-FlpO</sup>* line was developed by taking a 852 bp neural specific enhancer sequence of intron 1 in the mouse *Cdx2* gene, and cloning it upstream of a FlpO cassette. One likely source of ectopic brain expression for this line is related to genetic background. Since the regulatory sequences used during the cloning were from FVB genomic DNA, this line is recommended to be maintained on a FVB background. Given that it can be difficult to maintain the recommended minimum 50% FVB background during complex intersectional genetic strategies, a main caveat of the *Cdx2<sup>NSE-FlpO</sup>* line is the ability to maintain intersections on the recommended background. Here, we show the efficiency of the *Cdx2<sup>NSE-FlpO</sup>* when maintained on either a 25% FVB or a 12.5% FVB background (Fig 3G,I), where we observed ectopic brain expression in both cases. We observed similar levels of ectopic brain expression in *Cdx2<sup>Cre</sup>*;Ai14 mice. However, ectopic brain expression was different across these two lines: for the *Cdx2<sup>Cre</sup>* we largely saw brain expression in the cortex (Fig 3H, Fig S1I), while in *Cdx2<sup>NSE-FlpO</sup>* we saw widespread expression across the cortex and forebrain (Fig 3G). *Cdx2<sup>Cre</sup>* mice were generated by combining a 9.5kb promoter fragment of the human *Cdx2* gene, a Cre sequence that contained a neural specific enhancer sequence, and a 360 bp human beta-actin polyadenylation cassette<sup>13</sup>. The ectopic expression observed in *Cdx2<sup>Cre</sup>*;Ai14 tissue could potentially be a result of germline recombination of the Ai14 during development of the neuroectoderm, resulting in unexpected brain expression in the adult. In spite of these caveats, these lines are still valuable tools in the study of pain and itch. However, the following recommendations should be followed: when using the *Cdx2<sup>NSE-FlpO</sup>*, it is advised to check for germline recombination in tail DNA, which will help determine which animals to exclude for behavioral analysis. For both *Cdx2<sup>NSE-FlpO</sup>* and *Cdx2<sup>Cre</sup>*, it is advisable to cross breeder males to reporter females and check the brain for levels of germline recombination, specifically in the cortex and forebrain as observed in this study. Additionally, intersectional approaches should have built-in reporters when possible, so that brain expression can be assessed. For example, one could use an Ai14 reporter in a *Cdx2Cre*;Gene-flox cross, allowing them to visualize if Cre-mediated Ai14 expression is present in the brain. Lastly, in the absence of a reporter, tissue can be genotyped following behavioral experiments, and can be checked for brain recombination of Cre-dependent transgene expression. In addition to the *Cdx2<sup>NSE-FlpO</sup>* used in this study, there is another *Cdx2<sup>FlpO</sup>* mouse line<sup>27</sup> available that utilizes a similar design to the *Cdx2<sup>Cre</sup>*. Given the brain recombination observed in the *Cdx2<sup>Cre</sup>* (Fig 3H, Fig S1I), we recommend similar precautions when using this or any other caudal-targeting mouse line for brain-sparing manipulations.

In addition to the *Hoxb8<sup>FlpO</sup>*, there are two *Hoxb8<sup>Cre</sup>* mouse lines<sup>45,50</sup> that also use the *Hoxb8* gene to achieve brain-sparing targeting. The first mouse line uses a targeted knockin approach where an Internal Ribosome Entry Site or IRES followed by a Cre recombinase were knocked into the 3'UnTranslated Region (UTR) of the gene. This strategy is not expected to disrupt endogenous gene expression. However translational efficiency of the IRES-dependent second gene is usually around 20-50% that of the first gene<sup>75</sup>, which suggests that Cre

expression levels might not always be sufficient to induce cre recombination in all *Hoxb8*<sup>+</sup> cells. The second mouse line utilized a 11.4 kb sequence upstream of the *Hoxb8* gene, which included most of *Hoxb9* as well as the first 1058 bp of *Hoxb8*, and fused it to a 35 bp sequence containing a Kozak sequence and a start ATG<sup>45</sup>. A *Cre* recombinase cassette and a poly(A) sequence were inserted downstream of the ATG and the construct was injected in the pronucleus to create a transgenic mouse line. Although the generation of transgenic mouse lines has its drawbacks due to the random insertion of the transgene in the genome and the potential for disruption of a normal gene sequence, this strategy should not disrupt normal endogenous *Hoxb8* gene expression. In the generation of the *Hoxb8*<sup>FlpO</sup> mouse line, we utilized a T2A sequence fused to a FlpO sequence, which was knocked in just before the stop codon of *Hoxb8* exon 2. This approach has an advantage due to the self-cleaving ability of the T2A sequence, which results in functional FlpO recombinase function without influencing endogenous *Hoxb8* function. Notably the T2A sequence usually has a cleavage efficiency close to 100% meaning stoichiometric expression of the two genes flanking the peptide<sup>76</sup>. Since the *Hoxb8*<sup>FlpO</sup> was generated as a knock-in, we do not expect the background-dependent effects on expression profile observed with other lines, nor do we expect any disruption of endogenous *Hoxb8* function. Furthermore, we did not observe any germline recombination in *Hoxb8*<sup>FlpO</sup> brain tissue. While we observed no neuronal TdTomato expression in *Hoxb8*<sup>FlpO</sup> brain tissue, we did observe TdTomato fluorescence in microglia, which is consistent with the expression pattern of *Hoxb8* in mice. Since *Hoxb8*-lineage microglia account for one-third of all adult microglia in the mouse<sup>77</sup>, it is expected to see *Hoxb8*<sup>+</sup> microglia in the cortex. Lastly, a key factor for the utilization of *Hoxb8*<sup>FlpO</sup> mice in studying somatosensation is to ensure that insertion of a FlpO sequence into the *Hoxb8* locus does not alter sensory responses or motor performance. Here, we show that heterozygous and homozygous *Hoxb8*<sup>FlpO</sup> male and female mice exhibit none of the phenotypes associated with *Hoxb8* mutants, including dorsal horn formation, sensory deficits, excessive grooming, or aberrant motor behavior. Collectively, the *Hoxb8*<sup>FlpO</sup> represents a useful tool for the study of pain and itch because it offers the ability to restrict manipulations to the spinal cord and DRG.

Add Cdx2 paragraph here.

Although invaluable, intersectional genetics can be very costly, requiring time for complex matings as well as high mouse colony costs for the breeding and maintenance of various recombinase-dependent reporters. Here we describe a strategy using a Cre-DOG virus and intersectional GFP expression (**Fig 5C**) utilized in a modular way to incorporate any available Cre-dependent viral strategies, greatly reducing the cage costs associated with mouse genetics. Additionally, this approach is useful in manipulating neurons in the adult mouse which are defined by a molecular lineage during development, especially in cases of transient gene expression where Cre or Flp expression is not present in the adult animal. While this study utilizes Cre-DOG to drive expression of a fluorescent protein (**Fig 5D**), one could also utilize a Cre-dependent channelrhodopsin virus for optogenetic control of this population, or a Cre-dependent calcium indicator virus for calcium imaging, amongst other applications. Therefore, this approach allows for genetic access to a developmentally determined intersection through GFP expression, with the added benefit of modular usage of any available Cre-dependent viruses. A further utilization of this approach would be to use *CreER* mice<sup>78,79</sup>, where the expression of GFP can be induced and restricted to a specific developmental time point. This strategy would allow for the comparison of early vs. late developmental populations by capturing GFP populations at different time points. Furthermore, there are over 1000 existing transgenic GFP mouse lines that have been well characterized<sup>80,81</sup>. Rather than generating and validating Cre or Flp lines for manipulating these populations, one could instead utilize Cre-DOG to manipulate already characterized GFP lines. This strategy is much more accessible than traditional intersectional genetic approaches which require the long-term maintenance of multiple transgenic recombinase and reporter lines.

In summary, our *Hoxb8*<sup>FlpO</sup> mouse line is compatible with intersectional Cre-loxP approaches and can be utilized to target spinal and DRG neurons to study mechanisms of nociception, touch<sup>12,82</sup>, itch<sup>83,84</sup>,



proprioception<sup>85,86</sup> and locomotion<sup>87</sup>. We anticipate that this mouse line will be useful in elucidating spinal versus supraspinal effects of genes with widespread expression patterns. Furthermore, we describe here an approach using viral Cre-DOG technology to target developmentally determined neuronal populations in the adult. Collectively, these tools will allow for the dissection of spinal versus supraspinal contributions to sensory and motor function, with the added comparison of developmental manipulations to manipulations of developmentally determined adult lineages.

## ACKNOWLEDGEMENTS

We are grateful to all the members of the Abaira and Stuber lab for their comments. Financial support was provided by NIH/NINDS R01NS119268

## AUTHOR CONTRIBUTIONS

M.B., A.U., J.K., R.S., B.B., C.A. performed histological and behavioral experiments. P.R. led the generation of the *Hoxb8<sup>FlpO</sup>* mouse line. M.B., A.U., J.K. prepared the figures with the contribution of all the authors. V.E.A., M.B., A.U. conceived and supervised the study. A.U. wrote the paper with help from M.B. and V.E.A. All the authors contributed to its editing.

## DECLARATION OF INTERESTS

none

## MATERIALS AND METHODS

### Virus strains

AAV1 pAAV.CAG.LSL.TdTomato (Addgene 100048)

### Plasmids, cell lines, chemicals and peptides

*Hoxb8<sup>FlpO</sup>* plasmid #1

*Hoxb8<sup>FlpO</sup>* plasmid #2

pCMV<sup>Dsred-FRT-GFP-FRT</sup> Flp-dependent reporter plasmid

pCAGGS-FLPe Flpe plasmid

pAAV-EF1a-C-CreintG viral plasmid

pAAV-EF1a-N-CretrcintG viral plasmid

NEB 10-beta competent E.coli cells

### Experimental mouse lines

R26-FSF-TdTomato (derived from Ai65)

R26-FSF-YFP (derived from Ai57)

R26-LSL-TdTomato (Ai14)

FSF-Synaptophysin-GFP (derived from RC::FPSit)

RC::FLTG

*Hoxb8<sup>FlpO</sup>*

*Cdx2<sup>NSE-FlpO</sup>*

*Cdx2<sup>Cre</sup>*

### Key Resource Table

Mouse anti-NeuN (Millipore MAB377; RRID: AB\_2333092)

Rabbit anti-GFP (Invitrogen A11122; RRID: AB\_221569)

Rabbit anti-Dsred (Takara 632496)

Chicken anti-GFP (Aves GFP 1020; RRID: AB\_10000240)

Mouse anti-CGRP (Sigma C7113)  
 Rabbit anti-Iba1 (Abcam ab178846)  
 647 conjugated IB4 (Thermo Scientific/Life Technology I32450)  
 Alexa Fluor 488 Goat anti-mouse (Life technologies a11001)  
 Alexa Fluor 488 Goat anti-rabbit (Life Technologies a11034)  
 Alexa Fluor 488 Goat anti-chicken (Life Technologies a11039)  
 Alexa Fluor 546 Goat anti-mouse (Life Technologies a11030)  
 Alexa Fluor 546 Goat anti-rabbit (Life Technologies a11035)

## Software and algorithms

BioRender web software was utilized in the generation of figures. Digigait software was used for plantar paw tracking and gait analysis. Fiji and Zen imaging softwares were used for image processing and histological quantifications. Graphpad prism software was used for data presentation and statistical analysis.

## LEAD CONTACT AND MATERIALS AVAILABILITY

Further information and requests for resources should be directed to and will be fulfilled by the Lead Contact, Victoria E. Abaira (victoria.abaira@rutgers.edu).

## EXPERIMENTAL MODEL AND SUBJECT DETAILS

Experiments were conducted on mixed background C57Bl/6.(Jackson Laboratory, JAX#000664) and FVB (Charles River Strain#207). Transgenic mouse strains were used and maintained on a mixed genetic background (C57BL/6/FVB). Experimental animals used were of both sexes. All procedures were approved by the Rutgers University Institutional Animal Care and Use Committee (IACUC; protocol #: 201702589). All mice used in experiments were housed in a regular light cycle room (lights on from 08:00 to 20:00) with food and water available ad libitum. All cages were provided with nestlets to provide enrichment. All mice were between 1 and 4 months. Animals were co-housed with 4 mice per cage in a large holding room containing approximately 300 cages of mice.

## METHOD DETAILS

### Generation and validation of the *Hoxb8*<sup>FlpO</sup> mouse line

CRISPR-Cas9 was used to knock-in a T2a-FlpO sequence before the stop codon of *Hoxb8*. The *Hoxb8*-FlpO donor plasmid was designed by inserting a T2a sequence<sup>88</sup> and FlpO sequence<sup>89</sup> before the stop sequence at the end of *Hoxb8* Exon 2. The donor plasmid contained a 1987 bp 5' homology arm sequence, a 1347 bp T2a-FlpO sequence, and a 1082 bp 3' homology arm sequence, flanked by *EcoR1* restriction sites. Next, Cas9 protein (IDT) was complexed with a synthetic sgRNA GCAGAAGGGTGACAAGAAGT (MilliporeSigma) and microinjected with the donor plasmid into pronuclei of C57BL/6J zygotes. Founders were first genotyped using primers internal to FlpO (FLPOA 5'-TTCAGCGACATCAAGAACGTGGAC-3' AND FLPOB 5'-TCCTGTCTACTCTCTCAGCACG-3'). FlpO positive founders were screened with primers external to the homology arms to determine correct targeting. HOXB8E 5'-GTACCCAGAAGCCAATAGGATGC-3' and FLPT2AR 5'-TCGAAGTGGCTCATTGAGCCTG-3' were used to screen for 5' targeting and FLPOA and HOXB8F 5'-TCCTTCAGCCTCAGAATGCAAGG-3' were used to screen for 3' targeting.

### Cre-DOG viruses

pAAV-EF1a-C-CreintG (69571) and pAAV-EF1a-N-CretrcintG (69570) viral plasmids were obtained from Addgene. AAV2/1-EF1a-N-CretrcintG and AAV2/1-EF1a-C-CreintG viruses were then produced and concentrated into a single preparation with a titer >5<sup>10</sup> GC/ mL by Vigene Biosciences.

## **Surgical procedures and post-surgical care**

### **Spinal cord viral injection:**

Mice were anesthetized via continuous inhalation of isoflurane (1.5–2.5%) using an isoflurane vaporizer during the surgery. The skin was incised at Th12–L3. Paraspinal muscles around the interspace between Th12 and 13, Th13 and L1 vertebrae were removed and the dura mater and the arachnoid membrane were carefully incised to make a small window to allow the pulled glass pipettes (Wiretrol II, Drummond) to insert directly into the SDH. A total of 300–450 nl of AAV viruses were directly injected into two adjacent spots per spinal segment using a microsyringe pump injector (UMP3, World Precision Instruments).

## **Procedures and behavioral testing**

Male and female mice of a mixed genetic background (C57BL/6J and FVB/NJ) were used for behavioral analyses. Testing was done beginning at 7 weeks of age, and completed by 12 weeks of age. All animals were group housed, with control and mutant animals in the same litters and cages. Littermates from the same genetic crosses were used as controls for each group, to control for variability in mouse strains/backgrounds. Animal numbers per group for behavioral tests are indicated in figures. All behavioral analyses were done by observers blinded to genotype.

### **Allogrooming behavior:**

Mice were habituated to plastic chambers for 5 min then filmed for 10 min. Behavior such as elliptical, unilateral and bilateral stroke and body licking was scored.

### **Mechanical sensitivity testing:**

#### **Von frey filaments test**

Mice were placed in plastic chambers on a wire mesh grid and stimulated with von Frey filaments using the up-down method<sup>90</sup> starting with 1g and ending with 2g filament as cutoff value.

### **Thermal nociceptive threshold (Hargreaves's test)**

To assess hind paw heat sensitivity, Hargreaves' test was conducted using a plantar test device (IITC). Mice were placed individually into Plexiglas chambers on an elevated glass platform and allowed to acclimate for at least 30 minutes before testing. A mobile radiant heat source of constant intensity was then applied to the glabrous surface of the paw through the glass plate and the latency to paw withdrawal measured. Paw withdrawal latency is reported as the mean of three measurements for both hindpaws with at least a 5 min pause between measurements. A cut-off of 20 s was applied to avoid tissue damage.

### **Digigait automated treadmill**

Mice were first acclimated to the Digigait treadmill chamber for 5 minutes before beginning testing. Following this period, treadmill speed was gradually increased from 0 cm/s to 20 cm/s. The plantar placement of mouse limbs were recorded from underneath by a camera. Digigait software was used to track plantar paw placement over time. Appropriate thresholding and manual correction was applied to paw tracking when required. Thresholding was kept consistent between experimental groups. Digigait software utilized paw placement to provide measurements on gait consistency, frequency, duration, and length.

## **Genetic labeling**

Cre and Flp activity was evaluated by crossing Cre or Flp male mice to LSL or FSF-reporter females to obtain F1 progeny for histological analysis. Embryos were obtained using vaginal plug detection, and the day the plug was identified was considered E0.5.

## **Immunohistochemistry**

## Immunohistochemistry of free floating sections

Male and female mice (P30-37) were anesthetized with isoflurane, perfused with 5-10ml saline-heparin followed by 50ml 4% paraformaldehyde (PFA) in PBS at room temperature. Vertebral columns were dissected from perfused mice and post-fixed overnight in 4% PFA at 4°C. Spinal cord sections (50 µm thick) were cut on a vibrating blade microtome (Leica VT100S) and processed for immunohistochemistry as previously described<sup>91</sup>. In brief, tissue samples were rinsed in 50% ethanol/water solution for 30 min to allow for enhanced antibody penetration. Three washes in a high salt Phosphate Buffer (HS PBS) were conducted each lasting 10 min. The tissue was then incubated in a cocktail of primary antibodies in HS PBS containing 0.3% Triton X-100 (HS PBST) for 48 hrs at 4°C. Primary antibodies are listed in Key Resources Table. The tissue was washed in HS PBST then incubated in a secondary antibody solution in HS PBST for 24hrs at 4°C. Secondary antibodies included an array of species-specific Alexa Fluor 488, 546 and 647 conjugated IgGs (Invitrogen). Isolectin IB4 Conjugated to Alexa 647 dye was used at 1:200 (Invitrogen). The tissue was treated with HS PBST prior to incubation in 4',6-diamidino-2-phenylindole (DAPI) stain at 1:5000 dilution. Tissue sections were then mounted on glass slides and coverslipped with Fluoromount Aqueous Mounting Medium (Sigma). The slides were stored at 4°C.

## Immunohistochemistry of frozen tissue sections

Male and female mice (P30-35) were anesthetized with isoflurane, perfused with 5-10ml saline-heparin followed by 50ml 4% paraformaldehyde (PFA) in PBS at room temperature. Vertebral columns (including spinal cord and Dorsal Root Ganglions DRGs), heart, liver, kidney and hindpaw were dissected from perfused mice, post-fixed overnight in 4% PFA at 4°C. DGRs, heart, liver, kidney and hindpaw were rinsed with 1X PBS, cryoprotected in 30% sucrose, embedded in OCT and frozen at -80°C, then sectioned (12-40 µm thick) using a standard cryostat (Leica CM3050). For immunohistochemistry, primary antibodies were diluted in 1X PBS - 10% goat serum (Sigma) - 3% bovine albumine (Sigma) - 0.4% Triton X-100 and incubated overnight at 4°C. Primary antibodies are listed in Key Resources Table. Corresponding species-specific Alexa Fluor 488, 546 and 647 conjugated IgGs (Invitrogen) secondary antibodies were used for secondary detection. Isolectin IB4 Conjugated to Alexa 647 dye was used at 1:200 (Invitrogen).

## Imaging

Images were obtained on either a dissecting scope (Zeiss Stereo Discovery.V8) with mounted camera or a confocal microscope (Zeiss LSM 800). Embryos were post-fixed for 1 hour in 4% paraformaldehyde before cryoprotection. Cryosections were taken using a cryostat (Leica CM3050 S) at 12-40 µm thickness. For adult mouse tissue, mice were perfused transcardially with saline and 4% paraformaldehyde, and were then post-fixed overnight. Spinal cord and brainstem sections were taken using a vibratome (Leica VT1000 S) at 50 µm, while brain sections were taken at 150 µm. Within analyses, imaging parameters and thresholds were kept consistent.

## QUANTIFICATION AND STATISTICAL ANALYSIS

All data are reported as mean values ± standard error of the mean (SEM). Behavioral assays were replicated several times (3 to 10 times depending on the experiments) and averaged per animal. Statistics were then performed over the mean of animals. Statistical analysis was performed in GraphPad Prism (USA) using two-sided paired or unpaired Student's t-tests, one-way ANOVA for neuromorphological evaluations with more than two groups, and one- or two-way repeated-measures ANOVA for functional assessments, when data were distributed normally. Post hoc Tukey's or Bonferroni test was applied when appropriate. The significance level was set as  $p < 0.05$ . The nonparametric Mann-Whitney or Wilcoxon signed-rank tests were used in comparisons of  $<5$  or mice.

## DATA AND CODE AVAILABILITY



Data are available upon request from the Lead Contact, Victoria E. Abaira ([victoria.abaira@rutgers.edu](mailto:victoria.abaira@rutgers.edu)).

## FIGURES AND TABLES

### Figures

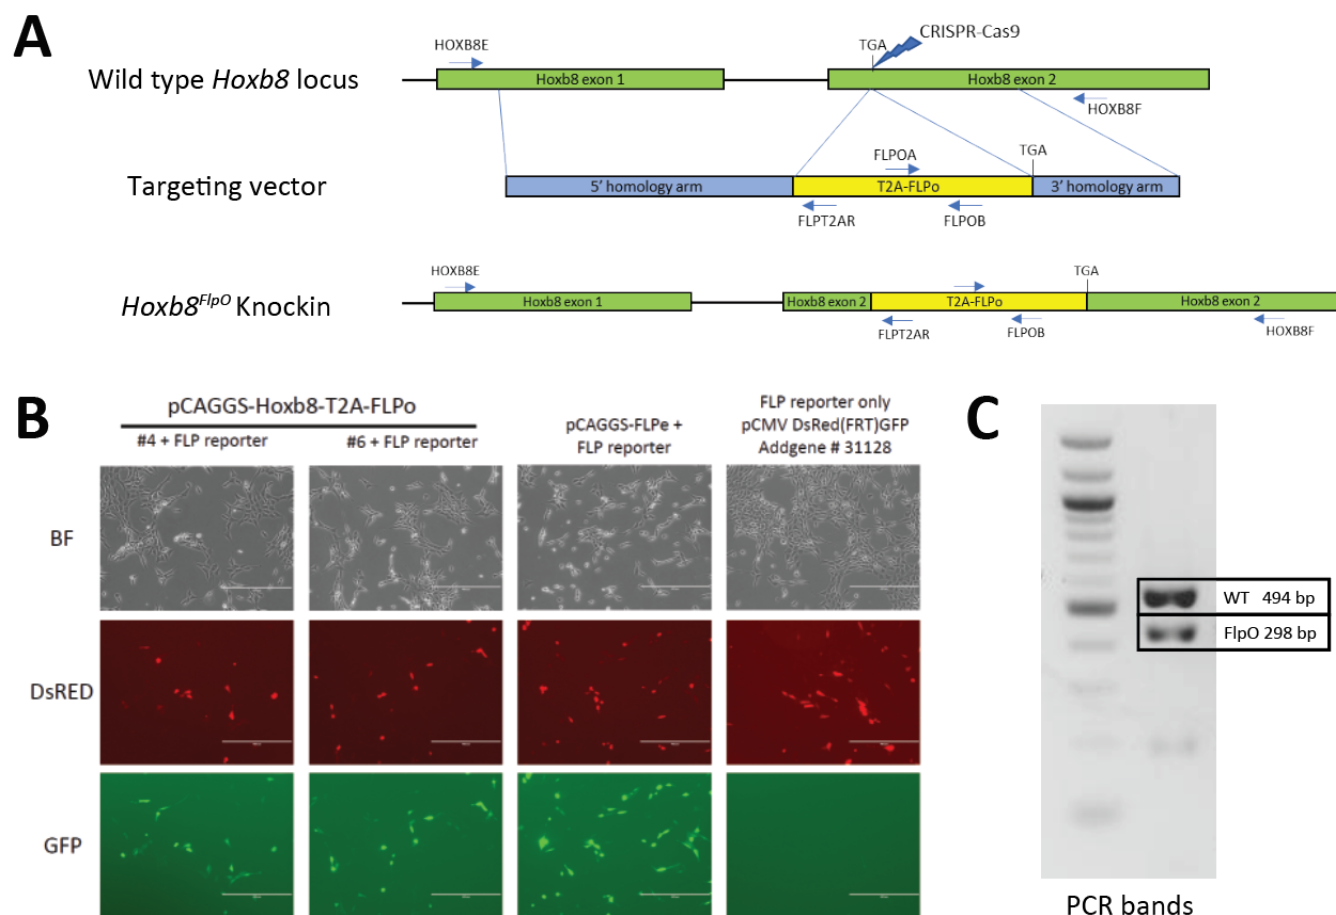

### Figure 1. Generation of *Hoxb8*<sup>FlpO</sup> mouse

**A.** Donor plasmid construct for *Hoxb8*<sup>FlpO</sup> containing a 5' homology arm (blue), a T2a-FlpO sequence (yellow), and a 3' homology arm (blue). The construct was targeted for insertion right before the stop codon of *Hoxb8* exon 2 (green).

**B.** Cotransfection of E. coli cells by 2 different *Hoxb8*<sup>FlpO</sup> plasmids along with a Flp-dependent GFP reporter (pCMV<sup>Dsred-FRT</sup>-GFP-FRT). A FlpE plasmid (pCAGGS-FLPe) was used as a positive control. Cells cotransfected with the *Hoxb8*<sup>FlpO</sup> plasmids or FlpE plasmid expressed Flp-mediated GFP recombination, while cells lacking the *Hoxb8*<sup>FlpO</sup> plasmid did not express GFP.

**C.** PCR genotyping results from heterozygous F1 progeny of the founder *Hoxb8*<sup>FlpO</sup> male. One common forward primer, one reverse wild type primer, and one reverse mutant primer were used for the reaction. Results displayed a 494 bp wild type band (top) and a 298 bp mutant band (bottom)

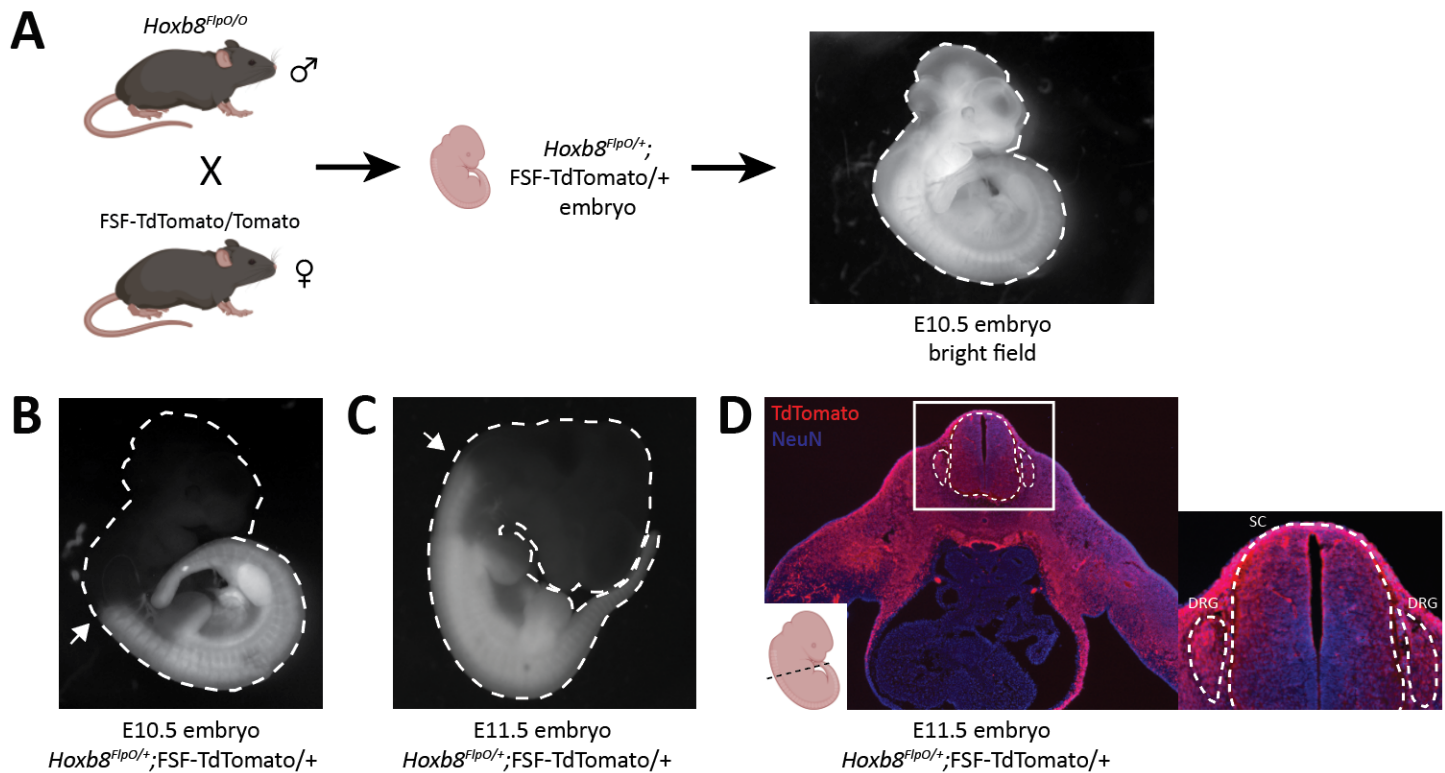

**Figure 2. *Hoxb8<sup>FlpO</sup>* mediated transgene expression is restricted to caudal embryonic structures starting at E10.5 of gestation.**

**A.** Schematic of breeding scheme for generation of *Hoxb8<sup>FlpO</sup>;FSF-TdTomato* embryos. *Hoxb8<sup>FlpO/O</sup>* males were crossed to FSF-TdTomato/Tomato females, and embryos were dissected from pregnant mothers at E10.5 and E11.5.

**B,C.** *Hoxb8<sup>FlpO</sup>*-induced expression of TdTomato in E10.5 (**B**) and E11.5 (**C**) embryos showing caudal expression pattern of *Hoxb8<sup>FlpO</sup>* during embryonic development. At E10.5, the rostral expression boundary of *Hoxb8<sup>FlpO</sup>* ends around somite 10 (arrow), while at E11.5 the rostral boundary extends to around somite 1/2 (arrow).

**D.** Transverse cryosection of E11.5 *Hoxb8<sup>FlpO</sup>;FSF-TdTomato* embryo showing TdTomato fluorescence (red) in viscera, DRG (dashed line), and spinal cord (dashed line). DAPI (blue) was used as a counterstain.

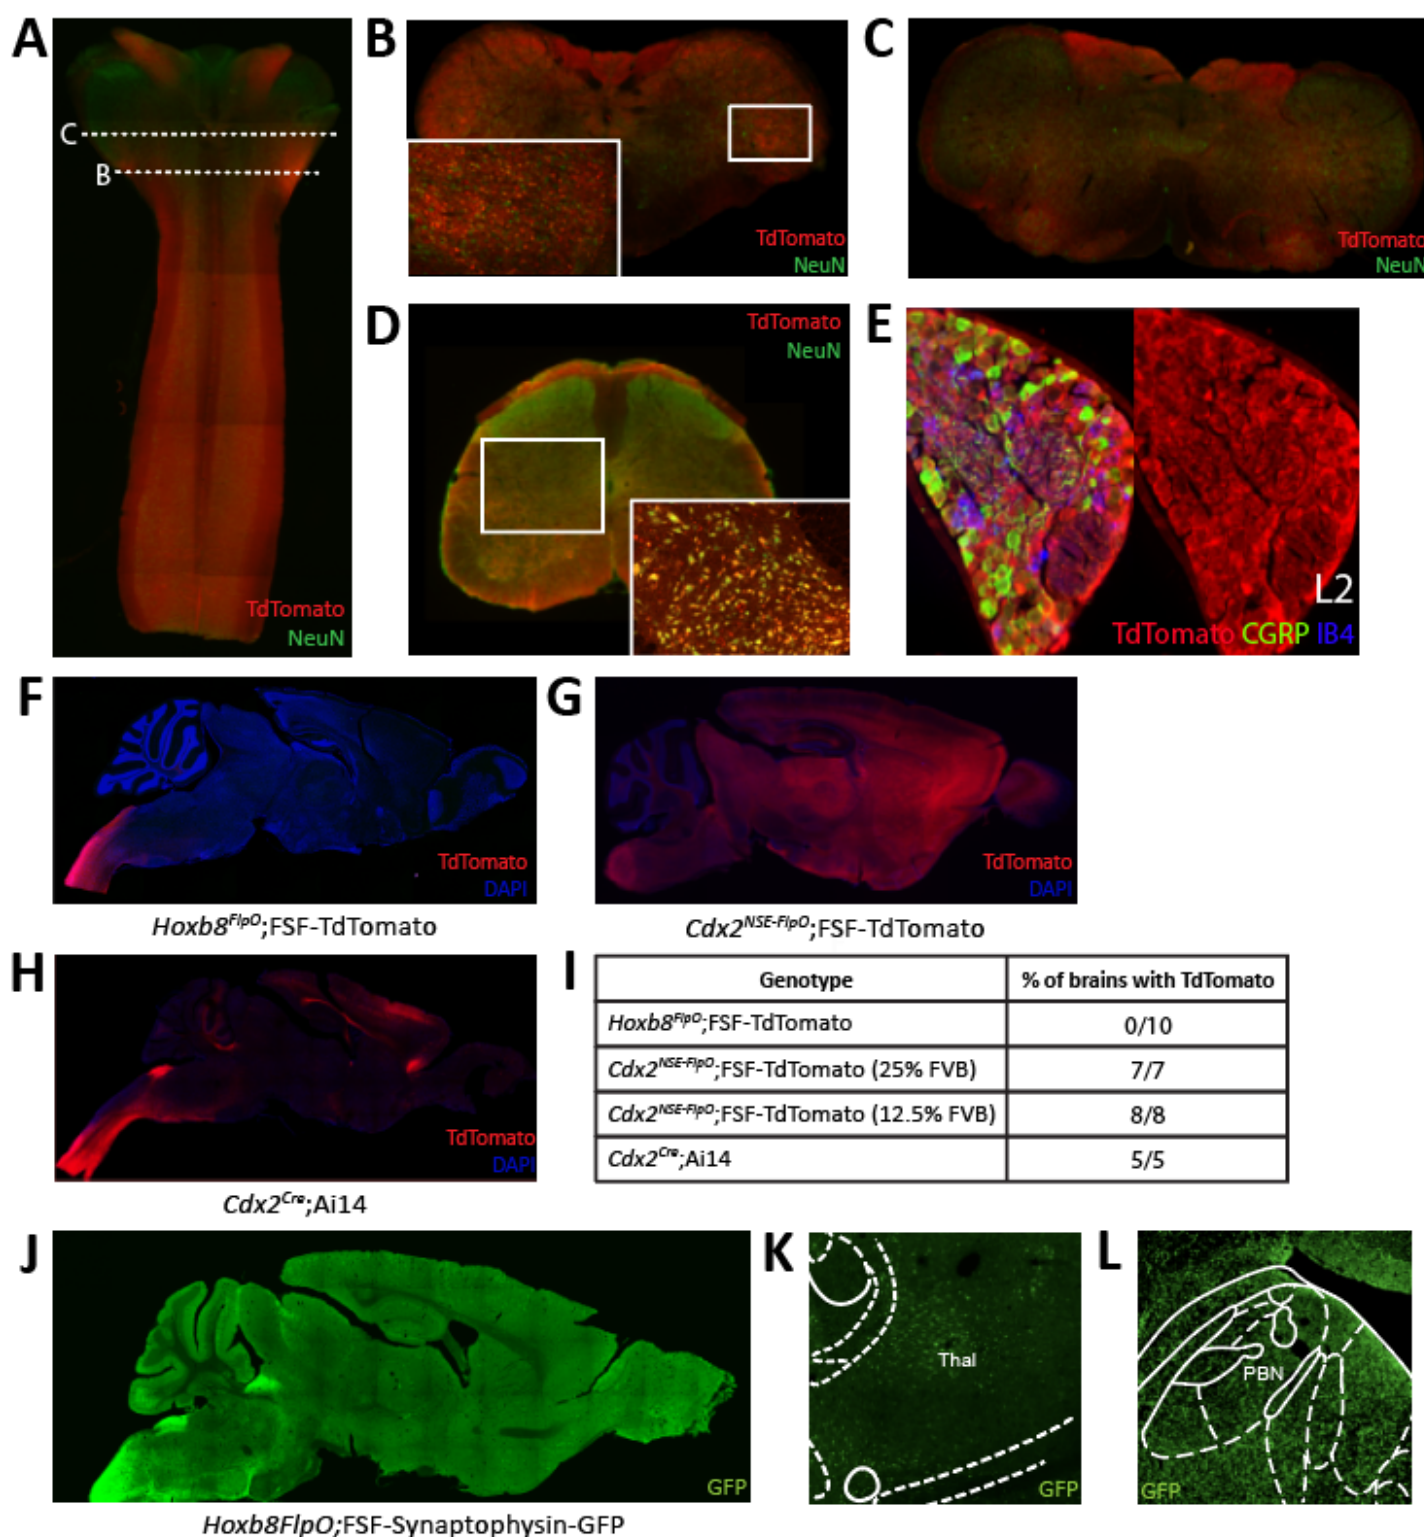

**Figure 3. *Hoxb8<sup>FlpO</sup>* mediated transgene expression in the adult is restricted to the spinal cord**

**A.** Sagittal section of cervical spinal cord and brainstem of adult (6 week) *Hoxb8<sup>FlpO</sup>;FSF-TdTomato* mouse showing TdTomato fluorescence (red) largely restricted to the spinal cord. NeuN (green) was used as a counterstain.

**B.** Transverse section of caudal brainstem from an adult *Hoxb8<sup>FlpO</sup>;FSF-TdTomato* mouse showing sparse TdTomato fluorescence (red) in neuronal cell bodies (green).



- C.** Transverse section of rostral brainstem from an adult *Hoxb8<sup>FlpO</sup>*;FSF-TdTomato mouse showing TdTomato fluorescence (red) in neuronal tracts, but not in cell bodies (green).
- D.** Transverse section of lumbar spinal cord from an adult *Hoxb8<sup>FlpO</sup>*;FSF-TdTomato mouse showing TdTomato fluorescence (red) in a large majority of spinal neurons (green). Zoomed in image of spinal neurons is shown in the bottom right.
- E.** Cryosection of an L2 dorsal root ganglia from a *Hoxb8<sup>FlpO</sup>*;FSF-TdTomato mouse showing TdTomato fluorescence (red) in a large majority of DRG neurons, including CGRP+ (green) and IB4+ (blue) neurons.
- F.** Sagittal section of brain and brainstem from an adult *Hoxb8<sup>FlpO</sup>*;FSF-TdTomato mouse showing TdTomato fluorescence (red) in tracts in the brainstem, but absence of TdTomato in neurons of the brain. DAPI (blue) was used as a counterstain.
- G.** Sagittal section of brain and brainstem from an adult *Cdx2<sup>NSE-FlpO</sup>*;FSF-TdTomato mouse on a 25% FVB background showing widespread neuronal TdTomato fluorescence (red) in the brain. DAPI (blue) was used as a counterstain.
- H.** Sagittal section of brain and brainstem from an adult *CdxCre*;Ai14 mouse showing TdTomato fluorescence (red) in the brain. DAPI (blue) was used as a counterstain.
- I.** Quantification of the number of brains containing neuronal TdTomato fluorescence in different caudal-targeting mouse lines. Notably, *Hoxb8* tissue had no observable neuronal TdTomato fluorescence, while neuronal TdTomato fluorescence was observed in all *Cdx2<sup>NSE-FlpO</sup>* and *Cdx2<sup>Cre</sup>* samples.
- J.** Image of sagittal brain from adult *Hoxb8<sup>FlpO</sup>*;FSF-Synaptophysin-GFP mice, showing projections from *Hoxb8*+ neurons (green) into the brain. Notably, no GFP+ neurons are observed in the brain.
- K,L.** *Hoxb8<sup>FlpO</sup>*+ projections (green) were observed in the thalamus (**K**) and parabrachial nucleus (**L**), likely reflecting spinothalamic and spinoparabrachial projections, respectively.

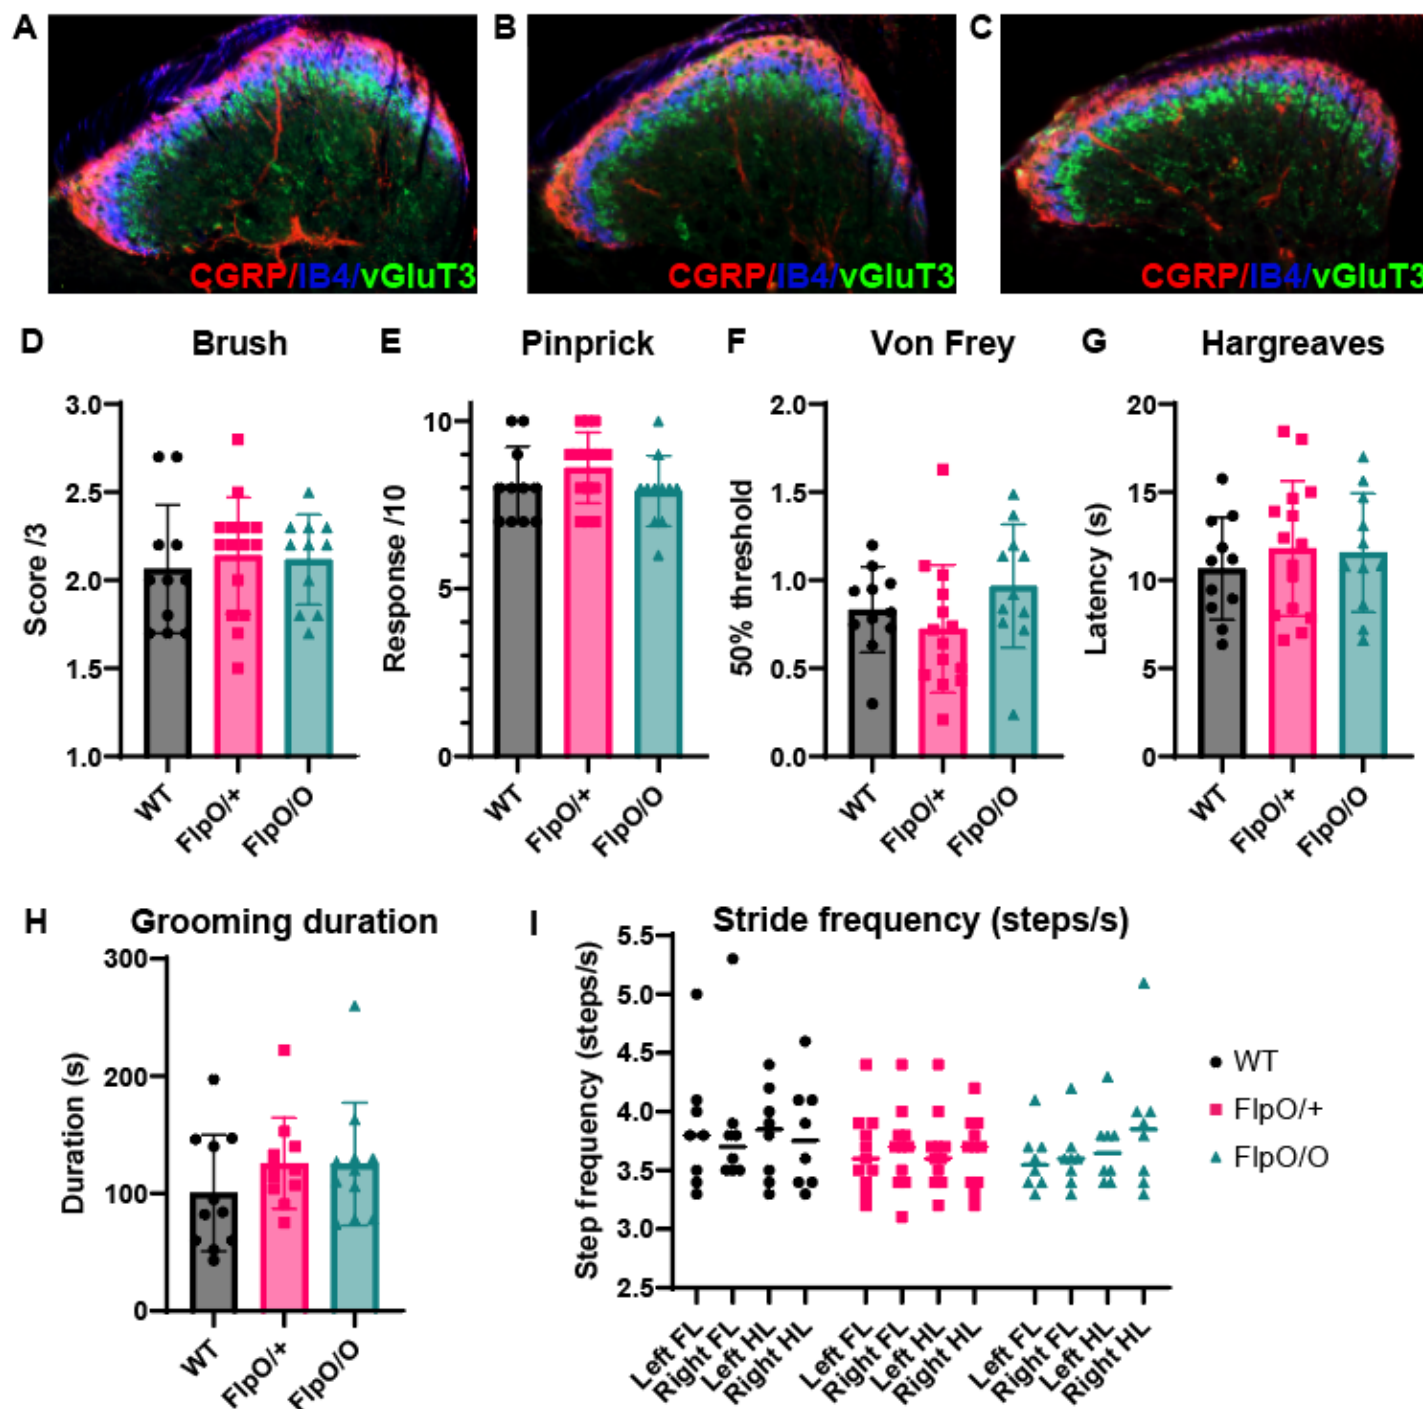

**Figure 4. *Hoxb8<sup>FlpO</sup>* mice exhibit normal spinal cord development and somatosensory function**

**A,B,C.** Immunostaining for different laminae markers in transverse lumbar sections from *Hoxb8<sup>FlpO/O</sup>* (A), *Hoxb8<sup>FlpO/+</sup>* (B), and wild type (WT) (C) mice reveals no obvious differences in laminae formation defined by immunostaining for lamina markers. Staining was conducted for CGRP (lamina I-red), IB4 (lamina II-blue), and VGLUT3 (lamina III-green). n=3 mice per group.

**D,E,F,G.** Sensory assays used to probe mechanical and thermal sensitivity in *Hoxb8<sup>FlpO</sup>* mice. *Hoxb8<sup>FlpO/O</sup>* and *Hoxb8<sup>FlpO/+</sup>* mice have no differences in withdrawal response to dynamic brush (D), noxious pinprick (E), von Frey (F), or radiant heat (G) compared to wild type littermate controls, suggesting normal mechanical and thermal sensory processing. Data is represented as mean±SEM (n=11-15 mice per group), and significance was assessed using a one-way ANOVA with Tukey's multiple comparisons.

- H.** *Hoxb8*<sup>FlpO/O</sup> and *Hoxb8*<sup>FlpO/+</sup> mice have no differences in time spent self-grooming compared to wild type littermates, suggesting normal grooming behavior. Data is represented as mean±SEM (n=10-11 mice per group), and significance was assessed using a one-way ANOVA with Tukey's multiple comparisons.
- I.** *Hoxb8*<sup>FlpO/O</sup> and *Hoxb8*<sup>FlpO/+</sup> mice Data is represented as mean+individual data points (n=9-15 mice per group), and significance was assessed using a one-way ANOVA with Tukey's multiple comparisons.

## A Schematic of the RC::FLTG line crossed to Lbx1Cre; HoxB8FlpO

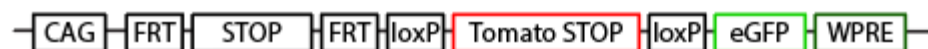

x HoxB8FlpO = Tomato expression

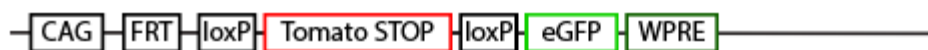

x Lbx1Cre; HoxB8FlpO = GFP expression

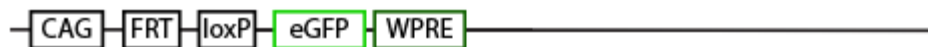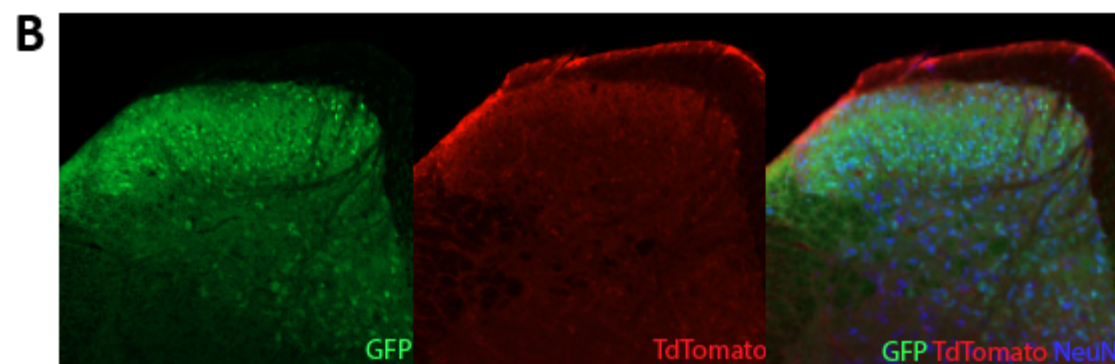

*Lbx1<sup>Cre</sup>; Hoxb8<sup>FlpO</sup>; RC::FLTG*

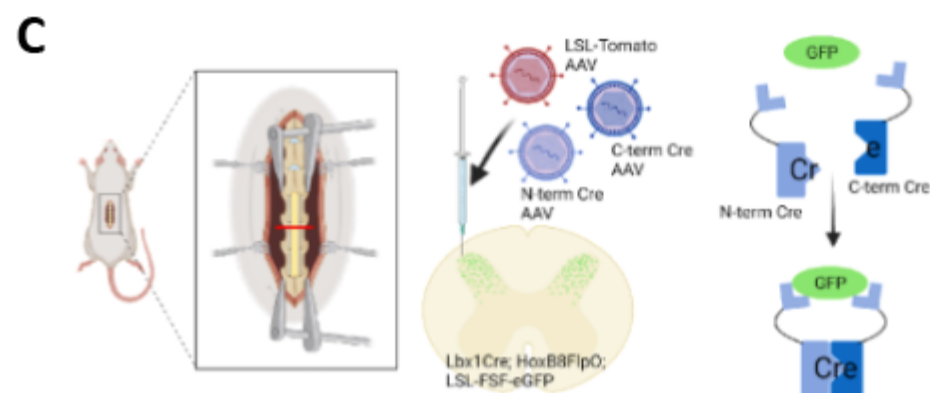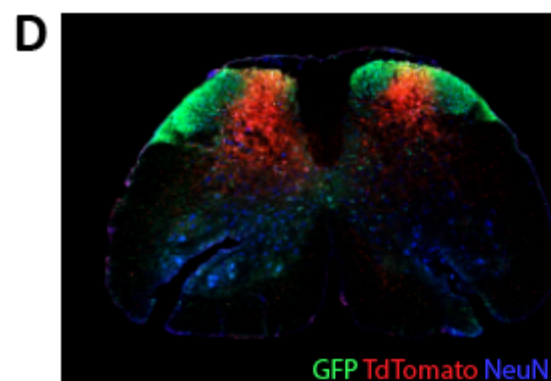

*Lbx1<sup>Cre</sup>; Hoxb8<sup>FlpO</sup>; RC::FLTG*  
AAV-Cre-DOG + AAV-LSL-TdTomato

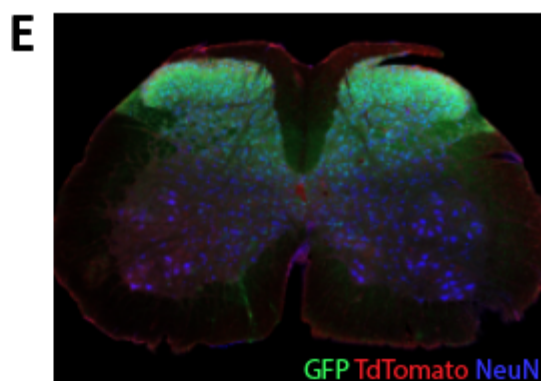

*Lbx1<sup>Cre</sup>; Hoxb8<sup>FlpO</sup>; RC::FLTG*  
AAV-LSL-TdTomato



## Figure 5. CRE-DOG virus to label spinal cord lineages defined by Hoxb8 and Lbx1

- A.** Schematic for utilization of the RC:FLTG reporter line to label the *Lbx1<sup>Cre</sup>;Hoxb8<sup>FlpO</sup>* intersection. Flp expression results in TdTomato fluorescence (middle), and additional Cre expression results in GFP expression (bottom).
- B.** Expression of GFP+ cells in a transverse lumbar section of a *Lbx1<sup>Cre</sup>;Hoxb8<sup>FlpO</sup>;RC::FLTG* mouse. Notably, TdTomato cells were not observed in this tissue, likely reflecting expression of *Lbx1Cre* in early developing *Hoxb8*+ cells, resulting in GFP expression in Cre+Flp+ cells.
- C.** Schematic of Cre-DOG virus strategy in the *Lbx1<sup>Cre</sup>;Hoxb8<sup>FlpO</sup>;RC::FLTG* mouse. The Cre-DOG virus consists of N- and C-terminal Cre fragments, which combine and become active in the presence of GFP. In *Lbx1<sup>Cre</sup>;Hoxb8<sup>FlpO</sup>;RC::FLTG* mice, endogenous *Lbx1<sup>Cre</sup>* expression is gone in the adult. Therefore, injection of the Cre-DOG virus drives expression of Cre in GFP+ cells, in the absence of endogenous *Lbx1<sup>Cre</sup>* expression.
- D.** Transverse lumbar image from a *Lbx1<sup>Cre</sup>;Hoxb8<sup>FlpO</sup>;RC::FLTG* mouse co-injected with AAV-Cre-DOG and AAV1-CAG-LSL-TdTomato. Cre expression becomes active in GFP+ cells, which drives expression of the viral LSL-TdTomato.
- E.** Transverse image from a *Lbx1<sup>Cre</sup>;Hoxb8<sup>FlpO</sup>;RC::FLTG* mouse injected with AAV1-CAG-LSL-TdTomato. TdTomato fluorescence is not observed in this tissue due to the lack of Cre expression in the adult mouse.

## SUPPLEMENTAL FIGURES

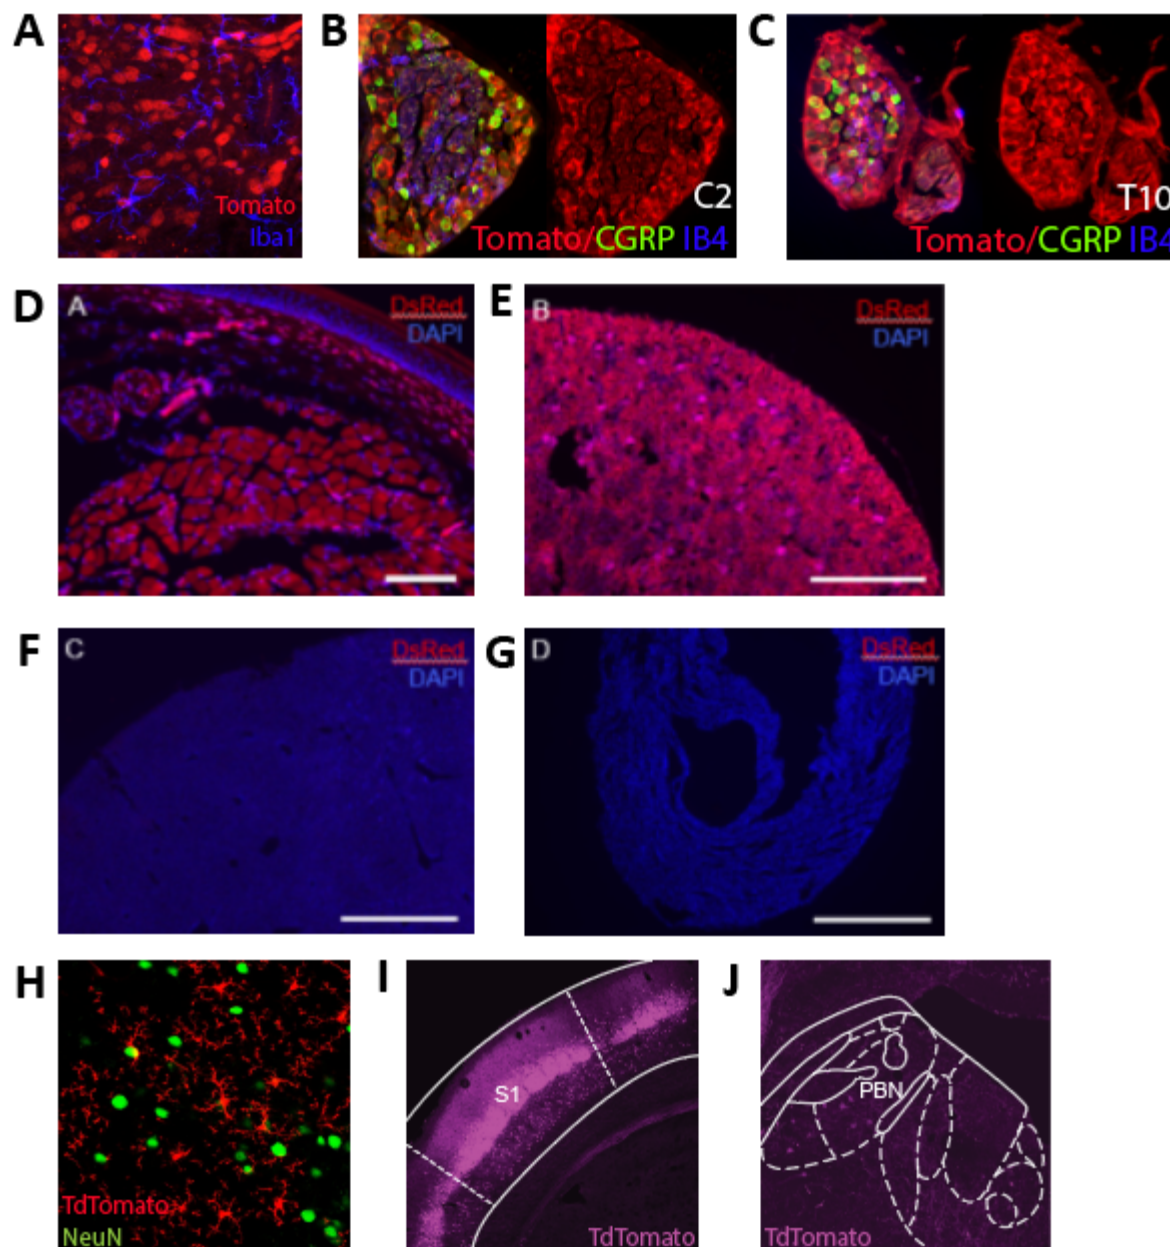

### Supplemental Figure 1. *Hoxb8<sup>FlpO</sup>* expression is present in the spinal cord, DRG, and caudal viscera, but not in neurons of the brain

**A.** Zoomed in image of a transverse lumbar spinal cord section from an adult *Hoxb8<sup>FlpO</sup>*;FSF-TdTomato mouse, showing *Hoxb8<sup>FlpO</sup>* expression is not present in spinal microglia. *Hoxb8<sup>FlpO</sup>*;FSF-TdTomato fluorescence (red) is not colocalized with Iba1+ microglia (blue).

**B,C.** Images of cryosectioned cervical (**B**) and thoracic (**C**) DRG from an adult *Hoxb8<sup>FlpO</sup>*;FSF-TdTomato mouse. *Hoxb8<sup>FlpO</sup>*;FSF-TdTomato fluorescence (red) is colocalized with the vast majority of DRG neurons, including CGRP+ (green) and IB4+ (blue) DRG neurons.

**D.** Image of cryosectioned hindpaw glabrous skin from an adult *Hoxb8<sup>FlpO</sup>*;FSF-TdTomato mouse, showing TdTomato expression (red) in the subcutis, with very sparse labeling in the reticular dermis. DAPI (blue) was used as a counterstain.

**E.** Image of cryosectioned kidney from an adult *Hoxb8<sup>FlpO</sup>*;FSF-TdTomato mouse, showing TdTomato expression (red) in endothelial cells. DAPI (blue) was used as a counterstain

**F.** Image of cryosectioned liver from an adult *Hoxb8<sup>FlpO</sup>*;FSF-TdTomato mouse, showing an absence of TdTomato fluorescence in liver tissue. DAPI (blue) was used as a counterstain

**G.** Image of cryosectioned heart from an adult *Hoxb8<sup>FlpO</sup>*;FSF-TdTomato mouse, showing an absence of TdTomato fluorescence in cardiac tissue. DAPI (blue) was used as a counterstain.

**H.** Zoomed in image of the cortex in coronal brain tissue from an adult *Hoxb8<sup>FlpO</sup>*;FSF-TdTomato mouse, showing the presence of TdTomato+ microglia (red) that are not colocalized with NeuN+ neurons (green).

**I,J.** Image of coronal brain and brainstem from adult *Cdx2<sup>Cre</sup>*;Ai14 mice, showing neuronal TdTomato fluorescence (red) in both the somatosensory cortex (**I**) and parabrachial nucleus (**J**)

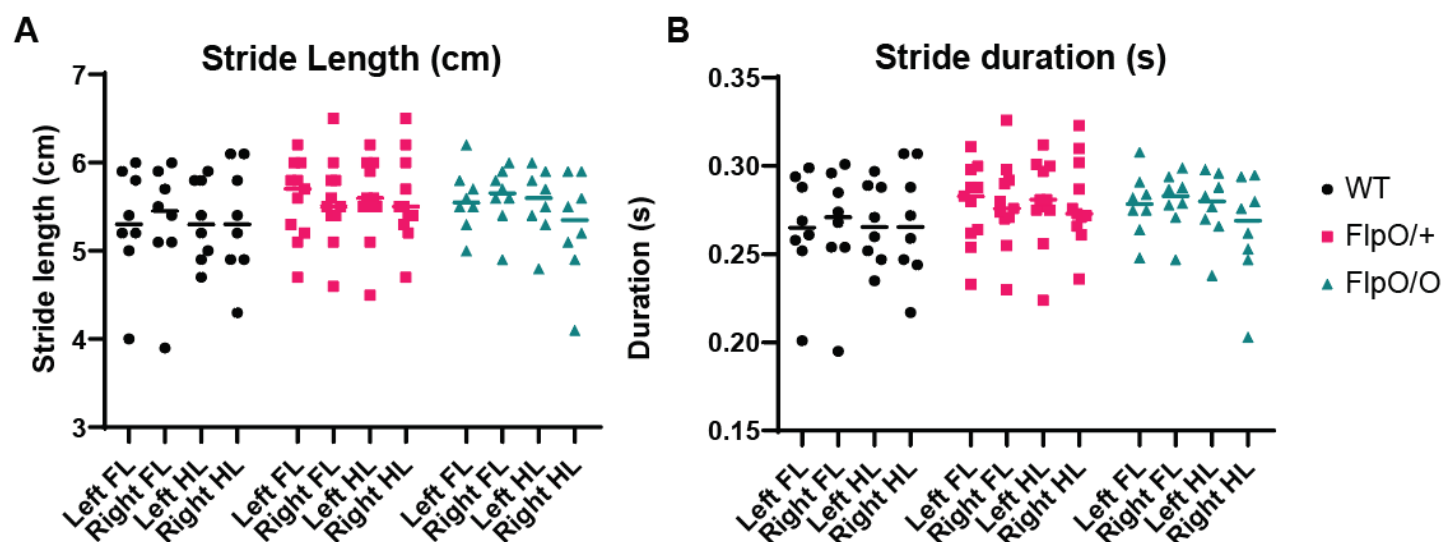

**Supplemental Figure 2. Homozygous and heterozygous *Hoxb8*<sup>FlpO</sup> mice have normal locomotor gait**

**A.** *Hoxb8*<sup>FlpO/FlpO</sup> and *Hoxb8*<sup>FlpO/+</sup> mice have normal stride length (cm) across all limbs compared to wild type controls. Data is represented as mean+individual data points (n=9-15 mice per group), and significance was assessed using a one-way ANOVA with Tukey's multiple comparisons.

**B.** *Hoxb8*<sup>FlpO/FlpO</sup> and *Hoxb8*<sup>FlpO/+</sup> mice have normal stride duration (s) across all limbs compared to wild type controls. Data is represented as mean+individual data points (n=9-15 mice per group), and significance was assessed using a one-way ANOVA with Tukey's multiple comparisons.



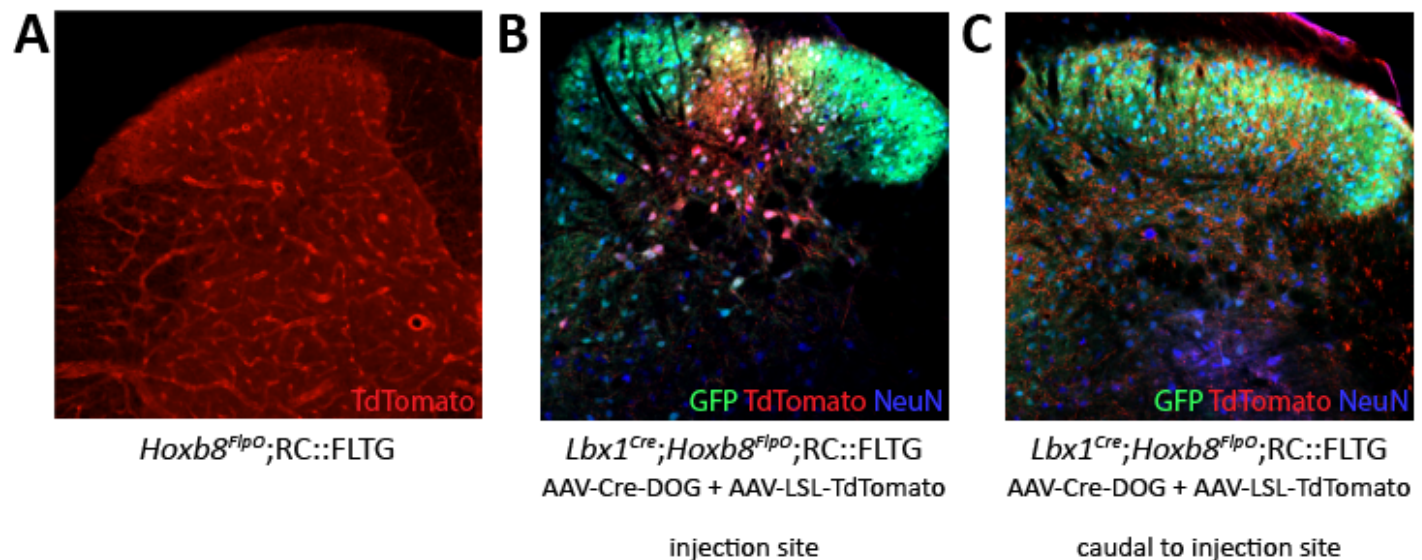

**Supplemental Figure 3. Using Cre-DOG in the GFP+ *Lbx1<sup>Cre</sup>;Hoxb8<sup>FlpO</sup>* intersection allows for Cre expression in adult *Lbx1*-lineage neurons**

**A.** Transverse lumbar spinal cord section from a *Hoxb8<sup>FlpO</sup>;RC::FLTG* mouse, showing Flp-mediated TdTomato fluorescence (red) in spinal neurons and blood vessels.

**B.** Transverse lumbar spinal cord section from a *Lbx1<sup>Cre</sup>;Hoxb8<sup>FlpO</sup>;RC::FLTG* mouse injected with AAV-Cre-DOG + AAV-LSL-TdTomato viruses, showing Cre and Flp-dependent GFP (green) expression within the intersection, as well as Cre-DOG-mediated expression of the AAV-LSL-TdTomato (red) at the injection site. NeuN (blue) was used as a counterstain.

**C.** Transverse lumbar spinal cord section from a *Lbx1<sup>Cre</sup>;Hoxb8<sup>FlpO</sup>;RC::FLTG* mouse injected with AAV-Cre-DOG + AAV-LSL-TdTomato, showing a lack of TdTomato fluorescence (red) in tissue caudal to the injection site. *Lbx1<sup>Cre</sup>;Hoxb8<sup>FlpO</sup>*+ cells are labeled with GFP (green), and NeuN (blue) was used as a counterstain.

## REFERENCES

1. Russ, D. E. *et al.* A harmonized atlas of mouse spinal cord cell types and their spatial organization. *Nat. Commun.* **12**, 1–20 (2021).
2. Dobrott, C. I., Sathiyamurthy, A. & Levine, A. J. Decoding Cell Type Diversity Within the Spinal Cord. *Curr Opin Physiol* **8**, 1–6 (2019).
3. From classical to current: Analyzing peripheral nervous system and spinal cord lineage and fate. *Dev. Biol.* **398**, 135–146 (2015).
4. Lai, H. C., Seal, R. P. & Johnson, J. E. Making sense out of spinal cord somatosensory development. *Development* vol. 143 3434–3448 (2016).
5. Lu, D. C., Niu, T. & Alaynick, W. A. Molecular and cellular development of spinal cord locomotor circuitry. *Front. Mol. Neurosci.* **8**, 25 (2015).
6. Dymecki, S. M., Ray, R. S. & Kim, J. C. Mapping cell fate and function using recombinase-based intersectional strategies. *Methods Enzymol.* **477**, 183–213 (2010).
7. Takeuchi, T. *et al.* Flp recombinase transgenic mice of C57BL/6 strain for conditional gene targeting. *Biochem. Biophys. Res. Commun.* **293**, 953–957 (2002).
8. Parkitna, J. R., Engblom, D. & Schütz, G. Generation of Cre recombinase-expressing transgenic mice using bacterial artificial chromosomes. *Methods Mol. Biol.* **530**, 325–342 (2009).
9. Charité, J., de Graaff, W., Vogels, R., Meijlink, F. & Deschamps, J. Regulation of the Hoxb-8 gene: synergism between multimerized cis-acting elements increases responsiveness to positional information. *Dev. Biol.* **171**, (1995).
10. van den Akker, E. *et al.* Targeted inactivation of Hoxb8 affects survival of a spinal ganglion and causes aberrant limb reflexes. *Mechanisms of Development* vol. 89 103–114 (1999).
11. Greer, J. M. & Capecchi, M. R. Hoxb8 is required for normal grooming behavior in mice. *Neuron* **33**, 23–34 (2002).
12. Abaira, V. E. *et al.* The Cellular and Synaptic Architecture of the Mechanosensory Dorsal Horn. *Cell* **168**, 295–310.e19 (2017).
13. Hinoi, T. *et al.* Mouse model of colonic adenoma-carcinoma progression based on somatic Apc

- inactivation. *Cancer Res.* **67**, 9721–9730 (2007).
14. Tang, J. C. Y. *et al.* Cell type–specific manipulation with GFP-dependent Cre recombinase. *Nature Neuroscience* vol. 18 1334–1341 (2015).
15. Lee, S. K. & Pfaff, S. L. Transcriptional networks regulating neuronal identity in the developing spinal cord. *Nat. Neurosci.* **4 Suppl**, 1183–1191 (2001).
16. Jessell, T. M. Neuronal specification in the spinal cord: inductive signals and transcriptional codes. *Nature Reviews Genetics* vol. 1 20–29 (2000).
17. Mechanical Allodynia Circuitry in the Dorsal Horn Is Defined by the Nature of the Injury. *Neuron* **109**, 73–90.e7 (2021).
18. Identification of Spinal Circuits Transmitting and Gating Mechanical Pain. *Cell* **159**, 1417–1432 (2014).
19. Adrienne E. Dubin, A. P. Nociceptors: the sensors of the pain pathway. *J. Clin. Invest.* **120**, 3760 (2010).
20. Todd, A. J. Neuronal circuitry for pain processing in the dorsal horn. *Nat. Rev. Neurosci.* **11**, (2010).
21. Mills, E. P. *et al.* Brainstem Pain-Control Circuitry Connectivity in Chronic Neuropathic Pain. *J. Neurosci.* **38**, 465–473 (2018).
22. Yang, S. & Chang, M. C. Chronic Pain: Structural and Functional Changes in Brain Structures and Associated Negative Affective States. *Int. J. Mol. Sci.* **20**, (2019).
23. Brian Roome, R. *et al.* Phox2a Defines a Developmental Origin of the Anterolateral System in Mice and Humans. *Cell Rep.* **33**, 108425 (2020).
24. Barik, A. *et al.* A spinoparabrachial circuit defined by Tacr1 expression drives pain. *Elife* **10**, (2021).
25. Awatramani, R., Soriano, P., Rodriguez, C., Mai, J. J. & Dymecki, S. M. Cryptic boundaries in roof plate and choroid plexus identified by intersectional gene activation. *Nat. Genet.* **35**, 70–75 (2003).
26. Farago, A. F., Awatramani, R. B. & Dymecki, S. M. Assembly of the brainstem cochlear nuclear complex is revealed by intersectional and subtractive genetic fate maps. *Neuron* **50**, 205–218 (2006).
27. Britz, O. *et al.* A genetically defined asymmetry underlies the inhibitory control of flexor-extensor locomotor movements. *Elife* **4**, (2015).
28. Pan, H. *et al.* Identification of a Spinal Circuit for Mechanical and Persistent Spontaneous Itch. *Neuron* **103**, 1135–1149.e6 (2019).

29. Coutaud, B. & Pilon, N. Characterization of a novel transgenic mouse line expressing Cre recombinase under the control of the Cdx2 neural specific enhancer. *Genesis* **51**, 777–784 (2013).
30. Sieber, M. A. *et al.* Lbx1 acts as a selector gene in the fate determination of somatosensory and viscerosensory relay neurons in the hindbrain. *J. Neurosci.* **27**, 4902–4909 (2007).
31. Bourane, S. *et al.* Identification of a spinal circuit for light touch and fine motor control. *Cell* **160**, 503–515 (2015).
32. Paixão, S. *et al.* Identification of Spinal Neurons Contributing to the Dorsal Column Projection Mediating Fine Touch and Corrective Motor Movements. *Neuron* vol. 104 749–764.e6 (2019).
33. Ray, R. S. *et al.* Impaired respiratory and body temperature control upon acute serotonergic neuron inhibition. *Science* **333**, 637–642 (2011).
34. Sciolino, N. R. *et al.* Recombinase-Dependent Mouse Lines for Chemogenetic Activation of Genetically Defined Cell Types. *Cell Rep.* **15**, 2563–2573 (2016).
35. Huang, T. *et al.* Identifying the pathways required for coping behaviours associated with sustained pain. *Nature* **565**, 86–90 (2018).
36. Hooks, B. M., Lin, J. Y., Guo, C. & Svoboda, K. Dual-channel circuit mapping reveals sensorimotor convergence in the primary motor cortex. *J. Neurosci.* **35**, 4418–4426 (2015).
37. Madisen, L. *et al.* Transgenic mice for intersectional targeting of neural sensors and effectors with high specificity and performance. *Neuron* **85**, 942–958 (2015).
38. Kakava-Georgiadou, N. *et al.* An Intersectional Approach to Target Neural Circuits With Cell- and Projection-Type Specificity: Validation in the Mesolimbic Dopamine System. *Frontiers in Molecular Neuroscience* vol. 12 (2019).
39. Fenno, L. E. *et al.* Comprehensive Dual- and Triple-Feature Intersectional Single-Vector Delivery of Diverse Functional Payloads to Cells of Behaving Mammals. *Neuron* **107**, 836–853.e11 (2020).
40. Cui, L. *et al.* Identification of Early RET+ Deep Dorsal Spinal Cord Interneurons in Gating Pain. *Neuron* **91**, 1137 (2016).
41. Peirs, C. *et al.* Dorsal Horn Circuits for Persistent Mechanical Pain. *Neuron* **87**, 797–812 (2015).
42. Koch, S. C. *et al.* ROR $\beta$  spinal interneurons gate sensory transmission during locomotion to secure a fluid

- p walking gait.
- Neuron*
- 96**
- , 1419 (2017).
- 
43. Bourane, S. *et al.* Gate control of mechanical itch by a subpopulation of spinal cord interneurons. *Science* vol. 350 550–554 (2015).
  44. Singh, P., Schimenti, J. C. & Bolcun-Filas, E. A Mouse Geneticist's Practical Guide to CRISPR Applications. *Genetics* vol. 199 1–15 (2015).
  45. Witschi, R. *et al.* Hoxb8-Cre Mice: a Tool for Brain-Sparing Conditional Gene Deletion. *Genesis* **48**, 596 (2010).
  46. Wang, Y., Wang, F., Wang, R., Zhao, P. & Xia, Q. 2A self-cleaving peptide-based multi-gene expression system in the silkworm *Bombyx mori*. *Sci. Rep.* **5**, 1–10 (2015).
  47. Deschamps, J. & Wijgerde, M. Two phases in the establishment of HOX expression domains. *Dev. Biol.* **156**, 473–480 (1993).
  48. Nagarajan, N., Jones, B. W., West, P. J., Marc, R. E. & Capecchi, M. R. Corticostriatal circuit defects in Hoxb8 mutant mice. *Mol. Psychiatry* **23**, 1868–1877 (2017).
  49. Holstege, J. C. *et al.* Loss of Hoxb8 alters spinal dorsal laminae and sensory responses in mice. *Proc. Natl. Acad. Sci. U. S. A.* **105**, 6338–6343 (2008).
  50. Chen, S.-K. *et al.* Hematopoietic Origin of Pathological Grooming in Hoxb8 Mutant Mice. *Cell* **141**, 775 (2010).
  51. Catela, C., Chen, Y., Weng, Y., Wen, K. & Kratsios, P. Control of spinal motor neuron terminal differentiation through sustained Hoxc8 gene activity. *eLife* vol. 11 (2022).
  52. Dorman, C. W., Krug, H. E., Frizelle, S. P., Funkenbusch, S. & Mahowald, M. L. A comparison of DigiGait™ and TreadScan™ imaging systems: assessment of pain using gait analysis in murine monoarthritis. *J. Pain Res.* **7**, 25–35 (2014).
  53. Madisen, L. *et al.* A robust and high-throughput Cre reporting and characterization system for the whole mouse brain. *Nat. Neurosci.* **13**, 133–140 (2009).
  54. Sousa, V. H., Miyoshi, G., Hjerling-Leffler, J., Karayannis, T. & Fishell, G. Characterization of Nkx6-2-derived neocortical interneuron lineages. *Cereb. Cortex* **19 Suppl 1**, i1–10 (2009).
  55. Daigle, T. L. *et al.* A Suite of Transgenic Driver and Reporter Mouse Lines with Enhanced Brain-Cell-Type



- Targeting and Functionality. *Cell* **174**, 465–480.e22 (2018).
56. Yamamoto, M. *et al.* A multifunctional reporter mouse line for Cre- and FLP-dependent lineage analysis. *Genesis* **47**, (2009).
  57. Buch, T. *et al.* A Cre-inducible diphtheria toxin receptor mediates cell lineage ablation after toxin administration. *Nat. Methods* **2**, 419–426 (2005).
  58. Zhu, H. *et al.* Cre-dependent DREADD (Designer Receptors Exclusively Activated by Designer Drugs) mice. *Genesis* **54**, 439–446 (2016).
  59. Madisen, L. *et al.* A toolbox of Cre-dependent optogenetic transgenic mice for light-induced activation and silencing. *Nat. Neurosci.* **15**, 793–802 (2012).
  60. Matthaei, K. I. Genetically manipulated mice: a powerful tool with unsuspected caveats. *J. Physiol.* **582**, 481–488 (2007).
  61. Knockout Mice Fact Sheet. *Genome.gov*  
<https://www.genome.gov/about-genomics/fact-sheets/Knockout-Mice-Fact-Sheet>.
  62. Gross, M. K., Dottori, M. & Goulding, M. Lbx1 specifies somatosensory association interneurons in the dorsal spinal cord. *Neuron* **34**, 535–549 (2002).
  63. Müller, T. *et al.* The homeodomain factor lbx1 distinguishes two major programs of neuronal differentiation in the dorsal spinal cord. *Neuron* **34**, 551–562 (2002).
  64. Löken, L. S. *et al.* Contribution of dorsal horn CGRP-expressing interneurons to mechanical sensitivity. *Elife* **10**, (2021).
  65. Cheng, L. *et al.* Identification of spinal circuits involved in touch-evoked dynamic mechanical pain. *Nat. Neurosci.* **20**, 804–814 (2017).
  66. Xu, Y. *et al.* Ontogeny of excitatory spinal neurons processing distinct somatic sensory modalities. *J. Neurosci.* **33**, 14738–14748 (2013).
  67. Flauaus, C. *et al.* Slick Potassium Channels Control Pain and Itch in Distinct Populations of Sensory and Spinal Neurons in Mice. *Anesthesiology* **136**, 802–822 (2022).
  68. Chen, L. *et al.* Conditional knockout of NaV1.6 in adult mice ameliorates neuropathic pain. *Scientific Reports* vol. 8 (2018).

69. Boinon, L. *et al.* Conditional knockout of CRMP2 in neurons, but not astrocytes, disrupts spinal nociceptive neurotransmission to control the initiation and maintenance of chronic neuropathic pain. *Pain* vol. 163 e368–e381 (2022).
70. Gingras, J. *et al.* Global Nav1.7 knockout mice recapitulate the phenotype of human congenital indifference to pain. *PLoS One* **9**, e105895 (2014).
71. Lau, J. *et al.* Temporal control of gene deletion in sensory ganglia using a tamoxifen-inducible Advillin-Cre-ERT2 recombinase mouse. *Mol. Pain* **7**, 100 (2011).
72. Zhou, L. *et al.* Murine peripherin gene sequences direct Cre recombinase expression to peripheral neurons in transgenic mice. *FEBS Letters* vol. 523 68–72 (2002).
73. Stirling, L. C. *et al.* Nociceptor-specific gene deletion using heterozygous Nav1.8-Cre recombinase mice. *Pain* **113**, 27–36 (2005).
74. Vrontou, S., Wong, A. M., Rau, K. K., Koerber, H. R. & Anderson, D. J. Genetic identification of C fibres that detect massage-like stroking of hairy skin in vivo. *Nature* **493**, 669–673 (2013).
75. Mizuguchi, H., Xu, Z., Ishii-Watabe, A., Uchida, E. & Hayakawa, T. IRES-Dependent Second Gene Expression Is Significantly Lower Than Cap-Dependent First Gene Expression in a Bicistronic Vector. *Molecular Therapy* vol. 1 376–382 (2000).
76. Kim, J. H. *et al.* High cleavage efficiency of a 2A peptide derived from porcine teschovirus-1 in human cell lines, zebrafish and mice. *PLoS One* **6**, e18556 (2011).
77. De, S. *et al.* Two distinct ontogenies confer heterogeneity to mouse brain microglia. *Development* **145**, (2018).
78. Feil, R. *et al.* Ligand-activated site-specific recombination in mice. *Proc. Natl. Acad. Sci. U. S. A.* **93**, 10887–10890 (1996).
79. Indra, A. K. *et al.* Temporally-controlled site-specific mutagenesis in the basal layer of the epidermis: comparison of the recombinase activity of the tamoxifen-inducible Cre-ERT and Cre-ERT2 recombinases. *Nucleic Acids Research* vol. 27 4324–4327 (1999).
80. Gong, S. *et al.* A gene expression atlas of the central nervous system based on bacterial artificial chromosomes. *Nature* **425**, 917–925 (2003).

81. Heintz, N. Gene expression nervous system atlas (GENSAT). *Nat. Neurosci.* **7**, 483 (2004).
82. Abaira, V. E. & Ginty, D. D. The sensory neurons of touch. *Neuron* **79**, 618–639 (2013).
83. Chen, X.-J. & Sun, Y.-G. Central circuit mechanisms of itch. *Nat. Commun.* **11**, 3052 (2020).
84. Koch, S. C., Acton, D. & Goulding, M. Spinal Circuits for Touch, Pain, and Itch. *Annu. Rev. Physiol.* **80**, 189–217 (2018).
85. Takeoka, A. & Arber, S. Functional Local Proprioceptive Feedback Circuits Initiate and Maintain Locomotor Recovery after Spinal Cord Injury. *Cell Rep.* **27**, 71–85.e3 (2019).
86. Johnson, E. O., Babis, G. C., Soultanis, K. C. & Soucacos, P. N. Functional neuroanatomy of proprioception. *J. Surg. Orthop. Adv.* **17**, (2008).
87. Côté, M.-P., Murray, L. M. & Knikou, M. Spinal Control of Locomotion: Individual Neurons, Their Circuits and Functions. *Front. Physiol.* **9**, 784 (2018).
88. Harris, J. A. *et al.* Anatomical characterization of Cre driver mice for neural circuit mapping and manipulation. *Front. Neural Circuits* **8**, 76 (2014).
89. Raymond, C. S. & Soriano, P. High-efficiency FLP and PhiC31 site-specific recombination in mammalian cells. *PLoS One* **2**, e162 (2007).
90. Chaplan, S. R., Bach, F. W., Pogrel, J. W., Chung, J. M. & Yaksh, T. L. Quantitative assessment of tactile allodynia in the rat paw. *J. Neurosci. Methods* **53**, 55–63 (1994).
91. Hughes, D. I. *et al.* Morphological, neurochemical and electrophysiological features of parvalbumin-expressing cells: a likely source of axo-axonic inputs in the mouse spinal dorsal horn. *The Journal of Physiology* vol. 590 3927–3951 (2012).
